# Supplementary material for: A Combined Experimental/Quantum-Chemical Study of Tetrel, Pnictogen, and Chalcogen Bonds of Linear Triatomic Molecules
Source: MDPI journal article supplement (doi:10.3390/molecules26226767), 2021-11-09
Supplement: s1 [file s1]

# **SUPPORTING INFORMATION**

**for**

## **A Combined Experimental / Quantum-Chemical Study of Tetrel, Pnictogen and Chalcogen Bonds of Linear Triatomic Molecules.**

Freija De Vleeschouwer<sup>1</sup>, Frank De Proft<sup>1,\*</sup>, Özge Ergün<sup>1</sup>, Wouter Herrebout<sup>2,\*</sup> and Paul Geerlings<sup>1,\*</sup>

- 1 Research Group of General Chemistry (ALGC), Vrije Universiteit Brussel (VUB), Pleinlaan 2, B-1050 Brussels, Belgium
- 2 Molecular Spectroscopy Research Group, Department of Chemistry, University of Antwerp (UA), Groenenborgerlaan 171, B-2020 Antwerp, Belgium

## Table of Contents

|                                                                                                                                                            |     |
|------------------------------------------------------------------------------------------------------------------------------------------------------------|-----|
| 1. CCSD(T)/CBS RESULTS USING FELLER AND SCHWARTZ EXTRAPOLATION .....                                                                                       | S3  |
| 2. DENSITY FUNCTIONAL APPROXIMATION BENCHMARK OF THE COMPLEXATION ENERGIES AT 0K AND EXCLUDING ZERO-POINT ENERGIES .....                                   | S4  |
| 3. COMPLEXATION ENERGY CORRELATION PLOTS OF PBE0-D3BJ/CC-PVTZ WITH EXPERIMENT AND WITH PBE0-D3BJ/TZ2P. ....                                                | S5  |
| 4. CARTESIAN COORDINATES OF THE ISOLATED LEWIS ACIDS AND BASES AND THEIR COMPLEXES (AT MP2/AUG-CC-PVTZ LEVEL).....                                         | S6  |
| 5. OBSERVED VIBRATIONAL FREQUENCIES FOR THE 1:1 COMPLEXES AND THE SHIFTS INDUCED BY COMPLEXATION (TABLES S4-S9).....                                       | S10 |
| 6. MP2/6-311++G(D,P) CALCULATED HARMONIC FREQUENCIES AND INFRARED INTENSITIES WITH THE FREQUENCY SHIFTS INDUCED BY THE COMPLEXATION (TABLES S10-S17). .... | S18 |

## 1. CCSD(T)/CBS Results Using Feller and Schwartz Extrapolation

**Table S1.** CCSD(T) energies for the cc-pVDZ, cc-pVTZ and cc-pVQZ basis sets, Feller three-point extrapolation of the Hartree-Fock energies  $E_{HF}(\infty)$  and CCSD(T)/CBS energies  $S_{CCSD(T)}(\infty)$  using the Schwartz three-point extrapolation of the correlation energy, defined as CCSD(T) – HF, for all monomers, given in Hartree.

| <b>CO<sub>2</sub></b> | <b>DZ</b>  | <b>TZ</b>  | <b>QZ</b>  | <b><math>E_{HF}(\infty)</math></b> | <b><math>S_{CCSD(T)}(\infty)</math></b> |
|-----------------------|------------|------------|------------|------------------------------------|-----------------------------------------|
| HF                    | -187.65020 | -187.70619 | -187.72056 | -187.72553                         |                                         |
| CCSD(T)               | -188.13293 | -188.30827 | -188.36802 |                                    | -188.41452                              |
|                       |            |            |            |                                    |                                         |
| <b>N<sub>2</sub>O</b> | <b>DZ</b>  | <b>TZ</b>  | <b>QZ</b>  | <b><math>E_{HF}(\infty)</math></b> | <b><math>S_{CCSD(T)}(\infty)</math></b> |
| HF                    | -183.69094 | -183.74377 | -183.75705 | -183.76151                         |                                         |
| CCSD(T)               | -184.22452 | -184.39359 | -184.45077 |                                    | -184.49526                              |
|                       |            |            |            |                                    |                                         |
| <b>OCS</b>            | <b>DZ</b>  | <b>TZ</b>  | <b>QZ</b>  | <b><math>E_{HF}(\infty)</math></b> | <b><math>S_{CCSD(T)}(\infty)</math></b> |
| HF                    | -510.28977 | -510.33817 | -510.35107 | -510.35575                         |                                         |
| CCSD(T)               | -510.72674 | -510.88502 | -510.93889 |                                    | -510.98066                              |
|                       |            |            |            |                                    |                                         |
| <b>DME</b>            | <b>DZ</b>  | <b>TZ</b>  | <b>QZ</b>  | <b><math>E_{HF}(\infty)</math></b> | <b><math>S_{CCSD(T)}(\infty)</math></b> |
| HF                    | -154.07571 | -154.12635 | -154.1379  | -154.14123                         |                                         |
| CCSD(T)               | -154.55369 | -154.72453 | -154.77745 |                                    | -154.81647                              |
|                       |            |            |            |                                    |                                         |
| <b>TMA</b>            | <b>DZ</b>  | <b>TZ</b>  | <b>QZ</b>  | <b><math>E_{HF}(\infty)</math></b> | <b><math>S_{CCSD(T)}(\infty)</math></b> |
| HF                    | -173.28170 | -173.33329 | -173.34531 | -173.34896                         |                                         |
| CCSD(T)               | -173.89413 | -174.08668 | -174.14630 |                                    | -174.19033                              |
|                       |            |            |            |                                    |                                         |

**Table S2.** CCSD(T) energies for the cc-pVDZ, cc-pVTZ and cc-pVQZ basis sets, Feller three-point extrapolation of the Hartree-Fock energies  $E_{HF}(\infty)$  and CCSD(T)/CBS energies  $S_{CCSD(T)}(\infty)$  using the Schwartz three-point extrapolation of the correlation energy, defined as CCSD(T) – HF, for all complexes, given in Hartree.

| <b>DME...CO<sub>2</sub></b>  | <b>DZ</b>  | <b>TZ</b>  | <b>QZ</b>  | <b><math>E_{HF}(\infty)</math></b> | <b><math>S_{CCSD(T)}(\infty)</math></b> |
|------------------------------|------------|------------|------------|------------------------------------|-----------------------------------------|
| HF                           | -341.73138 | -341.83566 | -341.86092 | -341.86899                         |                                         |
| CCSD(T)                      | -342.69435 | -343.03949 | -343.15183 |                                    | -343.23723                              |
|                              |            |            |            |                                    |                                         |
| <b>DME...N<sub>2</sub>O</b>  | <b>DZ</b>  | <b>TZ</b>  | <b>QZ</b>  | <b><math>E_{HF}(\infty)</math></b> | <b><math>S_{CCSD(T)}(\infty)</math></b> |
| HF                           | -337.76997 | -337.87141 | -337.89556 | -337.90311                         |                                         |
| CCSD(T)                      | -338.78483 | -339.12407 | -339.23388 |                                    | -339.31732                              |
|                              |            |            |            |                                    |                                         |
| <b>DME...OCS (tetrel)</b>    | <b>DZ</b>  | <b>TZ</b>  | <b>QZ</b>  | <b><math>E_{HF}(\infty)</math></b> | <b><math>S_{CCSD(T)}(\infty)</math></b> |
| HF                           | -664.36788 | -664.4648  | -664.48855 | -664.49628                         |                                         |
| CCSD(T)                      | -665.28610 | -665.61452 | -665.72112 |                                    | -665.80193                              |
|                              |            |            |            |                                    |                                         |
| <b>DME...OCS (chalcogen)</b> | <b>DZ</b>  | <b>TZ</b>  | <b>QZ</b>  | <b><math>E_{HF}(\infty)</math></b> | <b><math>S_{CCSD(T)}(\infty)</math></b> |
| HF                           | -664.36675 | -664.46436 | -664.48843 | -664.49630                         |                                         |
| CCSD(T)                      | -665.28523 | -665.61398 | -665.72074 |                                    | -665.80155                              |
|                              |            |            |            |                                    |                                         |
| <b>TMA...CO<sub>2</sub></b>  | <b>DZ</b>  | <b>TZ</b>  | <b>QZ</b>  | <b><math>E_{HF}(\infty)</math></b> | <b><math>S_{CCSD(T)}(\infty)</math></b> |
| HF                           | -360.93555 | -361.04042 | -361.06595 | -361.07417                         |                                         |
| CCSD(T)                      | -362.03608 | -362.40299 | -362.52169 |                                    | -362.61176                              |
|                              |            |            |            |                                    |                                         |
| <b>TMA...N<sub>2</sub>O</b>  | <b>DZ</b>  | <b>TZ</b>  | <b>QZ</b>  | <b><math>E_{HF}(\infty)</math></b> | <b><math>S_{CCSD(T)}(\infty)</math></b> |
| HF                           | -356.97411 | -357.07627 | -357.10068 | -357.10834                         |                                         |
| CCSD(T)                      | -358.12614 | -358.48741 | -358.60359 |                                    | -358.69167                              |
|                              |            |            |            |                                    |                                         |
| <b>TMA...OCS (tetrel)</b>    | <b>DZ</b>  | <b>TZ</b>  | <b>QZ</b>  | <b><math>E_{HF}(\infty)</math></b> | <b><math>S_{CCSD(T)}(\infty)</math></b> |
| HF                           | -683.57173 | -683.66916 | -683.69320 | -683.70107                         |                                         |
| CCSD(T)                      | -684.62795 | -684.97837 | -685.09139 |                                    | -685.17689                              |
|                              |            |            |            |                                    |                                         |
| <b>TMA...OCS (chalcogen)</b> | <b>DZ</b>  | <b>TZ</b>  | <b>QZ</b>  | <b><math>E_{HF}(\infty)</math></b> | <b><math>S_{CCSD(T)}(\infty)</math></b> |
| HF                           | -683.57163 | -683.66972 | -683.69415 | -683.70226                         |                                         |
| CCSD(T)                      | -684.62731 | -684.97788 | -685.09122 |                                    | -685.17693                              |
|                              |            |            |            |                                    |                                         |

## 2. Density Functional Approximation Benchmark of the Complexation Energies at 0K and Excluding Zero-Point Energies

**Table S3.** Theoretical complexation energies for a set of DFT functionals and basis sets, and comparison with experimental complexation energies, given in kJ mol<sup>-1</sup>. For all levels of theory, the Counterpoise method was used to correct for the basis set superposition error. MUE = mean unsigned error. RMSE = root mean square error. MAX: maximal error.

| Complex                | Bond type | $\Delta E_{exp}$ | $\omega$ B97X-D |           | B97X-D    |           | M11       |           | M06-2X-D3 |           | PBE0        | PBE0-D3BJ |
|------------------------|-----------|------------------|-----------------|-----------|-----------|-----------|-----------|-----------|-----------|-----------|-------------|-----------|
|                        |           |                  | TZ              | aug-TZ    | TZ        | aug-TZ    | TZ        | aug-TZ    | TZ        | aug-TZ    | TZ          | TZ        |
| DME...CO <sub>2</sub>  | tetrel    | -16.6(8)         | -12.3           | -12.7     | -9.9      | -10.5     | -15.5     | -15.2     | -18.0     | -18.5     | -8.9        | -14.2     |
| DME...N <sub>2</sub> O | pnictogen | -15.3(17)        | -8.6            | -8.7      | -6.6      | -7.0      | -11.8     | -11.2     | -13.6     | -13.9     | -5.4        | -10.5     |
| DME...OCS              | tetrel    | -13.6(12)        | -7.3            | -7.4      | -6.4      | -6.7      | -9.6      | -9.0      | -11.9     | -12.1     | -2.5        | -9.2      |
| DME...OCS              | chalcogen | –                | -5.3            | -5.6      | -6.7      | -7.0      | -7.0      | -6.8      | -9.0      | -9.3      | -3.7        | -8.2      |
| TMA...CO <sub>2</sub>  | tetrel    | -19.8(8)         | -14.8           | -15.4     | -15.1     | -16.0     | -16.4     | -16.1     | -19.9     | -20.7     | -7.9        | -16.6     |
| TMA...N <sub>2</sub> O | pnictogen | -10.3(11)        | -9.6            | -9.7      | -8.3      | -8.9      | -12.7     | -11.9     | -14.9     | -15.3     | -2.4        | -10.7     |
| TMA...OCS              | tetrel    | -14.1(9)         | -9.7            | -9.9      | -11.6     | -12.1     | -11.9     | -11.3     | -14.5     | -15.0     | -0.5        | -11.8     |
| TMA...OCS              | chalcogen | –                | -7.9            | -8.1      | -12.0     | -12.2     | -9.6      | -9.3      | -12.2     | -12.6     | -4.1        | -11.9     |
| MUE <sup>a</sup>       |           |                  | 4.6 (5.4)       | 4.4 (5.1) | 5.3 (6.0) | 4.8 (5.5) | 2.8 (2.9) | 3.1 (3.4) | 1.6 (1.0) | 1.9 (1.3) | 10.4 (10.9) | 3.0 (3.5) |
| RMSE <sup>a</sup>      |           |                  | 5.0 (5.5)       | 4.8 (5.2) | 5.9 (6.4) | 5.4 (5.9) | 3.0 (3.1) | 3.3 (3.5) | 2.2 (1.2) | 2.4 (1.3) | 10.6 (11.1) | 3.3 (3.6) |
| MAX <sup>a</sup>       |           |                  | 6.7 (6.7)       | 6.6 (6.6) | 8.7 (8.7) | 8.3 (8.3) | 4.0 (4.0) | 4.6 (4.6) | 4.6 (1.7) | 5.0 (1.8) | 13.7 (13.7) | 4.8 (4.8) |

<sup>a</sup> The data for the pnictogen bonding complex TMA...N<sub>2</sub>O are not included in the error statistics in brackets.

### 3. Complexation Energy Correlation Plots of PBE0-D3BJ/cc-pVTZ with Experiment and with PBE0-D3BJ/TZ2P.

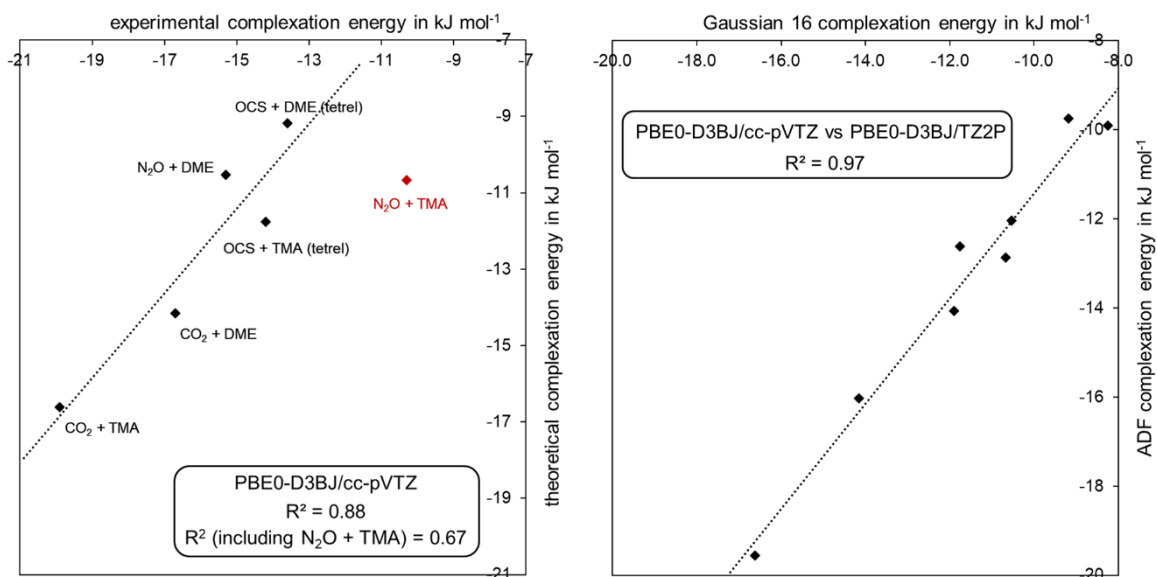

**Figure S1.** Left: correlation between PBE0-D3BJ/cc-pVTZ and experimental complexation energies. Right: correlation between PBE0-D3BJ/cc-pVTZ (Gaussian 16) and PBE0-D3BJ/TZ2P (ADF) complexation energies. The dashed line represents the linear regression line. Pnictogen complex N<sub>2</sub>O + TMA is excluded from the linear regression analysis in the left scatter plot.

#### 4. Cartesian Coordinates of the Isolated Lewis Acids and Bases and their Complexes (at MP2/aug-cc-pVTZ level)

##### CO<sub>2</sub>

|   |            |            |             |
|---|------------|------------|-------------|
| C | 0.00000000 | 0.00000000 | 0.00000000  |
| O | 0.00000000 | 0.00000000 | 1.16566900  |
| O | 0.00000000 | 0.00000000 | -1.16566900 |

##### N<sub>2</sub>O

|   |            |            |             |
|---|------------|------------|-------------|
| O | 0.00000000 | 0.00000000 | 1.11440200  |
| N | 0.00000000 | 0.00000000 | -1.21161600 |
| N | 0.00000000 | 0.00000000 | -0.06198600 |

##### OCS

|   |            |            |             |
|---|------------|------------|-------------|
| O | 0.00000000 | 0.00000000 | -1.68640900 |
| C | 0.00000000 | 0.00000000 | -0.52218500 |
| S | 0.00000000 | 0.00000000 | 1.03902400  |

##### DME

|   |             |             |             |
|---|-------------|-------------|-------------|
| O | 0.00000000  | 0.00000000  | 0.60001800  |
| C | 0.00000000  | 1.15801100  | -0.19907800 |
| H | -0.88701800 | 1.19625300  | -0.83582900 |
| H | 0.00000000  | 2.01428500  | 0.46605300  |
| H | 0.88701800  | 1.19625300  | -0.83582900 |
| C | 0.00000000  | -1.15801100 | -0.19907800 |
| H | 0.00000000  | -2.01428500 | 0.46605300  |
| H | -0.88701800 | -1.19625300 | -0.83582900 |
| H | 0.88701800  | -1.19625300 | -0.83582900 |

##### TMA

|   |             |             |             |
|---|-------------|-------------|-------------|
| C | 0.00000000  | 1.36832400  | -0.06451800 |
| H | -0.88289600 | 1.88221600  | 0.30748300  |
| H | 0.88289600  | 1.88221600  | 0.30748300  |
| H | 0.00000000  | 1.43142200  | -1.16336400 |
| C | -1.18500300 | -0.68416200 | -0.06451800 |
| H | -1.18859900 | -1.70571800 | 0.30748300  |
| H | -2.07149500 | -0.17649800 | 0.30748300  |
| H | -1.23964800 | -0.71571100 | -1.16336400 |
| N | 0.00000000  | 0.00000000  | 0.40093100  |
| C | 1.18500300  | -0.68416200 | -0.06451800 |
| H | 2.07149500  | -0.17649800 | 0.30748300  |
| H | 1.18859900  | -1.70571800 | 0.30748300  |
| H | 1.23964800  | -0.71571100 | -1.16336400 |

DME...CO<sub>2</sub>

|   |             |             |             |
|---|-------------|-------------|-------------|
| O | 0.00000000  | 0.00000000  | 0.88218800  |
| C | 0.00000000  | 1.16502000  | 1.67346200  |
| H | 0.88810000  | 1.20628200  | 2.30760700  |
| H | 0.00000000  | 2.01157500  | 0.99566000  |
| H | -0.88810000 | 1.20628200  | 2.30760700  |
| C | 0.00000000  | -1.16502000 | 1.67346200  |
| H | 0.00000000  | -2.01157500 | 0.99566000  |
| H | 0.88810000  | -1.20628200 | 2.30760700  |
| H | -0.88810000 | -1.20628200 | 2.30760700  |
| C | 0.00000000  | 0.00000000  | -1.72405900 |
| O | 0.00000000  | 1.16548300  | -1.75102800 |
| O | 0.00000000  | -1.16548300 | -1.75102800 |

DME...N<sub>2</sub>O

|   |             |             |             |
|---|-------------|-------------|-------------|
| O | 0.00000000  | 0.90840900  | 0.00000000  |
| C | 1.15851200  | 1.70856700  | 0.00000000  |
| H | 1.19588200  | 2.34371200  | 0.88782300  |
| H | 2.01097800  | 1.03808800  | 0.00000000  |
| H | 1.19588200  | 2.34371200  | -0.88782300 |
| C | -1.16670100 | 1.69699900  | 0.00000000  |
| H | -2.01320800 | 1.01889100  | 0.00000000  |
| H | -1.21012600 | 2.33153300  | 0.88804800  |
| H | -1.21012600 | 2.33153300  | -0.88804800 |
| O | 1.11701500  | -1.76501700 | 0.00000000  |
| N | -1.20684600 | -1.79353500 | 0.00000000  |
| N | -0.05833500 | -1.77618000 | 0.00000000  |

## DME...OCS (tetrel)

|   |             |             |             |
|---|-------------|-------------|-------------|
| O | 0.00000000  | 1.26408500  | 0.00000000  |
| C | 1.25695100  | 1.89618900  | 0.00000000  |
| H | 1.38293500  | 2.51956600  | 0.88824300  |
| H | 2.00853400  | 1.11379700  | 0.00000000  |
| H | 1.38293500  | 2.51956600  | -0.88824300 |
| C | -1.04880200 | 2.20346600  | 0.00000000  |
| H | -1.97829700 | 1.64456300  | 0.00000000  |
| H | -1.00639500 | 2.83818200  | 0.88802400  |
| H | -1.00639500 | 2.83818200  | -0.88802400 |
| O | -1.67639900 | -1.10070500 | 0.00000000  |
| C | -0.56141600 | -1.43268000 | 0.00000000  |
| S | 0.92171700  | -1.92392200 | 0.00000000  |

## DME...OCS (chalcogen)

|   |             |             |             |
|---|-------------|-------------|-------------|
| O | 0.49984700  | -1.79255700 | 0.00000000  |
| C | -0.78666400 | -2.36550800 | 0.00000000  |
| H | -0.94070000 | -2.98199600 | 0.88832400  |
| H | -1.50322000 | -1.55089800 | 0.00000000  |
| H | -0.94070000 | -2.98199600 | -0.88832400 |
| C | 1.49720800  | -2.78728200 | 0.00000000  |
| H | 2.45769200  | -2.28407200 | 0.00000000  |
| H | 1.41960800  | -3.41849500 | 0.88785200  |
| H | 1.41960800  | -3.41849500 | -0.88785200 |
| O | -0.88965100 | 3.65977600  | 0.00000000  |
| C | -0.50952000 | 2.55734200  | 0.00000000  |
| S | 0.00000000  | 1.07943100  | 0.00000000  |

TMA...CO<sub>2</sub>

|   |             |             |             |
|---|-------------|-------------|-------------|
| C | 0.37313000  | -1.49512900 | 1.19144900  |
| H | 1.45974000  | -1.53000200 | 1.18754500  |
| H | 0.04908800  | -0.94209400 | 2.06970000  |
| H | -0.00909100 | -2.52352800 | 1.26212600  |
| C | 0.37313000  | -1.49512900 | -1.19144900 |
| H | 0.04908800  | -0.94209400 | -2.06970000 |
| H | 1.45974000  | -1.53000200 | -1.18754500 |
| H | -0.00909100 | -2.52352800 | -1.26212600 |
| O | 0.37313000  | 1.84589400  | -1.16606700 |
| N | -0.09545200 | -0.82292000 | 0.00000000  |
| C | -1.53976700 | -0.74616900 | 0.00000000  |
| H | -1.87574500 | -0.20923800 | 0.88472900  |
| H | -1.87574500 | -0.20923800 | -0.88472900 |
| H | -2.00636700 | -1.74176100 | 0.00000000  |
| C | 0.36958300  | 1.79936400  | 0.00000000  |
| O | 0.37313000  | 1.84589400  | 1.16606700  |

TMA...N<sub>2</sub>O

|   |             |             |             |
|---|-------------|-------------|-------------|
| C | -1.61665100 | -1.13486700 | -0.59234700 |
| H | -1.65200100 | -1.07054900 | -1.67712100 |
| H | -1.11090700 | -2.05747000 | -0.31710000 |
| H | -2.64815200 | -1.17420400 | -0.21186000 |
| C | -1.50428100 | 1.23720000  | -0.45881700 |
| H | -0.91777600 | 2.07101300  | -0.08011200 |
| H | -1.53411500 | 1.30120300  | -1.54373600 |
| H | -2.53153100 | 1.32851300  | -0.07578200 |
| O | 1.91352400  | 1.11015400  | -0.11985800 |
| N | -0.88385700 | -0.00680300 | -0.06232800 |
| C | -0.81027000 | -0.09162900 | 1.37883500  |
| H | -0.32462400 | -1.02170500 | 1.66595800  |
| H | -0.22593300 | 0.74175700  | 1.76376400  |
| H | -1.80475800 | -0.06140100 | 1.84791900  |
| N | 1.95562900  | -1.21403700 | -0.14316300 |
| N | 1.93234400  | -0.06524700 | -0.13438000 |



TMA...OCS (tetrel)

|   |             |             |             |
|---|-------------|-------------|-------------|
| C | -1.53582800 | -1.40484700 | -0.53201200 |
| H | -1.44861300 | -1.42777800 | -1.61574900 |
| H | -0.85808000 | -2.14736200 | -0.11596100 |
| H | -2.56516300 | -1.67996700 | -0.25812200 |
| C | -2.01314000 | 0.92708800  | -0.62079000 |
| H | -1.68027300 | 1.90401300  | -0.27774900 |
| H | -1.93312100 | 0.89661800  | -1.70481200 |
| H | -3.07065000 | 0.80054200  | -0.34555000 |
| O | 1.15673500  | 1.77035100  | -0.09583500 |
| C | 1.53274700  | 0.66849600  | -0.08401800 |
| S | 2.11283000  | -0.78285800 | -0.05761800 |
| N | -1.17212100 | -0.09572000 | -0.04347200 |
| C | -1.24075700 | -0.05509100 | 1.39870200  |
| H | -0.56792800 | -0.80107700 | 1.81653800  |
| H | -0.93241300 | 0.92741400  | 1.75031000  |
| H | -2.25619700 | -0.25331600 | 1.77266700  |

TMA...OCS (chalcogen)

|   |             |             |             |
|---|-------------|-------------|-------------|
| C | -0.43022700 | -1.88560300 | 1.18633200  |
| H | 0.16050200  | -1.66296200 | 2.07176500  |
| H | -1.30744300 | -1.24198500 | 1.18600900  |
| H | -0.76660300 | -2.93111400 | 1.24409300  |
| C | 1.55486900  | -2.43838500 | 0.00000000  |
| H | 2.14722600  | -2.21111700 | -0.88301500 |
| H | 2.14722600  | -2.21111700 | 0.88301500  |
| H | 1.32842500  | -3.51459800 | 0.00000000  |
| O | -0.76250100 | 3.89706000  | 0.00000000  |
| C | -0.43022700 | 2.77928400  | 0.00000000  |
| S | 0.01452900  | 1.27708900  | 0.00000000  |
| N | 0.35523200  | -1.63130200 | 0.00000000  |
| C | -0.43022700 | -1.88560300 | -1.18633200 |
| H | -1.30744300 | -1.24198500 | -1.18600900 |
| H | 0.16050200  | -1.66296200 | -2.07176500 |
| H | -0.76660300 | -2.93111400 | -1.24409300 |

## 5. Observed Vibrational Frequencies for the 1:1 Complexes and the Shifts Induced by Complexation (Tables S4-S9).

**Table S4.** Observed vibrational frequencies, in  $\text{cm}^{-1}$ , for the 1:1 complex of trimethyl amine with  $^{12}\text{CO}_2$ . For completeness, also the shifts induced by the complexation with the partner molecule are given.

|                           | Assignment                              | Monomer<br>$\tilde{\nu}$ | Complex<br>$\tilde{\nu}$ | $\Delta\tilde{\nu}$ |
|---------------------------|-----------------------------------------|--------------------------|--------------------------|---------------------|
| $\text{N}(\text{CH}_3)_3$ | $\nu_{12}(\text{e})$                    | 2979.7                   | 2982.1                   | 2.4                 |
|                           | $2(\nu_{20} + \nu_{21})$                | 2956.7                   | 2957.4                   | 0.7                 |
|                           | $\nu_1(\text{a}_1), \nu_{13}(\text{e})$ | 2947.2                   | 2948.7                   | 1.5                 |
|                           | $2\nu_{17}$                             | 2820.6                   | 2825.8                   | 5.2                 |
|                           | $\nu_2(\text{a}_1), \nu_{14}(\text{e})$ | 2771.0                   | 2776.3                   | 5.3                 |
|                           | $\nu_{15} + \nu_{18}$                   | 2733.7                   | 2733.8                   | 0.1                 |
|                           | $\nu_3 + \nu_5$                         | 2637.1                   | 2642.8                   | 5.7                 |
|                           | $\nu_{16} + \nu_5$                      | 2626.0                   | 2631.9                   | 5.9                 |
|                           |                                         | 2589.0                   | 2595.7                   | 6.7                 |
|                           | $\nu_{15} + \nu_{20}$                   | 2495.5                   | 2497.9                   | 2.4                 |
|                           | $\nu_{18} + \nu_6$                      | 2098.9                   | 2096.0                   | -2.9                |
|                           | $2\nu_{20}$                             | 2080.5                   | 2076.4                   | -4.1                |
|                           | $\nu_5 + \nu_6$                         | 2011.0                   | 2015.6                   | 4.6                 |
|                           | $\nu_{20} + \nu_6$                      | 1867.0                   | 1865.1                   | -1.9                |
|                           | $\nu_{20} + \nu_{21}$                   | 1475.9                   | 1475.2                   | -0.7                |
|                           | $\nu_{15}(\text{e})$                    | 1468.9                   | 1469.6                   | 0.7                 |
|                           | $\nu_3(\text{a}_1)$                     | 1456.1                   | 1455.8                   | -0.3                |
|                           | $\nu_{16}(\text{e})$                    | 1440.2                   | 1441.5                   | 1.3                 |
|                           | $\nu_{17}(\text{e})$                    | 1415.8                   | 1424.5                   | 8.7                 |
|                           |                                         | 1294.2                   | 1288.8                   | -5.4                |
|                           | $\nu_{18}(\text{e})$                    | 1274.1                   | 1272.7                   | -1.4                |
|                           | $\nu_5(\text{a}_1)$                     | 1185.2                   | 1190.5                   | 5.3                 |
|                           | $\nu_{19}(\text{e})$                    | 1099.1                   | 1099.4                   | 0.3                 |
|                           | $\nu_{20}(\text{e})$                    | 1042.1                   | 1039.4                   | -2.7                |
|                           | $2\nu_{21}$                             | 852.0                    | 851.0                    | -1.0                |
|                           | $\nu_6(\text{a}_1)$                     | 828.4                    | 828.2                    | -0.2                |
| $^{12}\text{CO}_2$        | $\nu_1 + \nu_3$                         | 3704.2                   | 3690.5                   | -13.7               |
|                           | $2\nu_2 + \nu_3$                        | 3601.6                   | 3606.7                   | 5.1                 |
|                           | $\nu_3(\Sigma_u^+)$                     | 2341.8                   | 2334.3                   | -7.5                |
|                           | $\nu_{2a}(\Pi_g)$                       | 664.3                    | 669.9                    | 5.6                 |
|                           | $\nu_{2b}(\Pi_u)$                       | 664.3                    | 628.9                    | -35.4               |

**Table S5.** Observed vibrational frequencies, in  $\text{cm}^{-1}$ , for the 1:1 complex of trimethyl amine with  $^{13}\text{CO}_2$ . For completeness, also the shifts induced by the complexation with the partner molecule are given.

|                           |                                         | Monomer       | Complex       |                     |
|---------------------------|-----------------------------------------|---------------|---------------|---------------------|
|                           | Assignment                              | $\tilde{\nu}$ | $\tilde{\nu}$ | $\Delta\tilde{\nu}$ |
| $\text{N}(\text{CH}_3)_3$ | $\nu_{12}(\text{e})$                    | 2979.7        | 2982.2        | 2.5                 |
|                           | $2(\nu_{20} + \nu_{21})$                | 2956.7        | 2957.3        | 0.6                 |
|                           | $\nu_1(\text{a}_1), \nu_{13}(\text{e})$ | 2947.2        | 2948.9        | 1.7                 |
|                           | $2\nu_{17}$                             | 2820.6        | 2825.6        | 5.0                 |
|                           | $\nu_2(\text{a}_1), \nu_{14}(\text{e})$ | 2771.0        | 2776.1        | 5.1                 |
|                           | $\nu_{15} + \nu_{18}$                   | 2733.7        | 2733.5        | -0.2                |
|                           |                                         | 2718.2        | 2720.4        | 2.2                 |
|                           | $\nu_3 + \nu_5$                         | 2637.1        | 2641.9        | 4.8                 |
|                           | $\nu_{16} + \nu_5$                      | 2626.0        | 2631.9        | 5.9                 |
|                           | $\nu_{15} + \nu_{20}$                   | 2495.5        | 2497.3        | 1.8                 |
|                           | $\nu_{18} + \nu_6$                      | 2098.9        | 2096.8        | -2.1                |
|                           | $2\nu_{20}$                             | 2080.5        | 2076.4        | -4.1                |
|                           | $\nu_5 + \nu_6$                         | 2011.0        | 2015.9        | 4.9                 |
|                           | $\nu_{20} + \nu_6$                      | 1867.0        | 1865.4        | -1.6                |
|                           |                                         | 1524.8        | 1524.2        | -0.6                |
|                           | $\nu_{20} + \nu_{21}$                   | 1475.9        | 1475.1        | -0.8                |
|                           | $\nu_{15}(\text{e})$                    | 1468.9        | 1469.5        | 0.6                 |
|                           | $\nu_3(\text{a}_1)$                     | 1456.1        | 1455.7        | -0.4                |
|                           | $\nu_{16}(\text{e})$                    | 1440.2        | 1441.4        | 1.2                 |
|                           | $\nu_{17}(\text{e})$                    | 1415.8        | 1424.5        | 8.7                 |
|                           |                                         | 1294.2        | 1288.8        | -5.4                |
|                           | $\nu_{18}(\text{e})$                    | 1274.1        | 1272.2        | -1.9                |
|                           | $\nu_5(\text{a}_1)$                     | 1185.2        | 1190.2        | 5.0                 |
|                           | $\nu_{19}(\text{e})$                    | 1099.1        | 1099.2        | 0.1                 |
|                           | $\nu_{20}(\text{e})$                    | 1042.1        | 1040.0        | -2.1                |
|                           | $2\nu_{21}$                             | 852.0         | 851.5         | -0.5                |
|                           | $\nu_6(\text{a}_1)$                     | 828.4         | 828.2         | -0.2                |
| $^{13}\text{CO}_2$        | $2\nu_2 + \nu_3$                        | 3623.4        | 3609.3        | -14.1               |
|                           | $\nu_3(\Sigma_u^+)$                     | 2276.6        | 2269.4        | -7.2                |
|                           | $\nu_{2a}(\Pi_g)$                       | 645.9         | 650.4         | 4.5                 |
|                           | $\nu_{2b}(\Pi_u)$                       | 645.9         | 611.4         | -34.5               |

**Table S6.** Observed vibrational frequencies, in  $\text{cm}^{-1}$ , for the 1:1 complex of dimethyl ether with  $\text{N}_2\text{O}$ . For completeness, also the shifts induced by the complexation with the partner molecule are given.

|                           | Assignment                                | Monomer<br>$\tilde{\nu}$ | Complex<br>$\tilde{\nu}$ | $\Delta\tilde{\nu}$ |
|---------------------------|-------------------------------------------|--------------------------|--------------------------|---------------------|
| $\text{CH}_3\text{OCH}_3$ | $\nu_1(\text{a}_1), \nu_{12}(\text{b}_1)$ | 2994.0                   | 2994.5                   | 0.5                 |
|                           |                                           | 2954.3                   | 2954.9                   | 0.6                 |
|                           | $2\nu_3$                                  | 2936.6                   | 2937.0                   | 0.4                 |
|                           | $\nu_3 + \nu_{19}$                        | 2932.0                   | 2933.6                   | 1.6                 |
|                           | $\nu_{18}(\text{b}_2)$                    | 2919.5                   | 2920.6                   | 1.1                 |
|                           | $2\nu_{14}$                               | 2913.4                   | 2913.6                   | 0.2                 |
|                           | $\nu_{14} + \nu_{19}$                     | 2908.5                   | 2909.5                   | 1.0                 |
|                           | $2\nu_{19}$                               | 2889.4                   | 2892.1                   | 2.7                 |
|                           | $\nu_3 + \nu_{15}$                        | 2883.6                   | 2886.1                   | 2.5                 |
|                           | $\nu_{14} + \nu_{15}$                     | 2869.7                   | 2871.4                   | 1.7                 |
|                           | $\nu_{15} + \nu_{19}$                     | 2867.7                   | 2868.5                   | 0.8                 |
|                           | $\nu_2(\text{a}_1), \nu_{13}(\text{b}_1)$ | 2814.6                   | 2816.8                   | 2.2                 |
|                           |                                           | 2700.0                   | 2702.8                   | 2.8                 |
|                           |                                           | 2694.3                   | 2695.1                   | 0.8                 |
|                           |                                           | 2629.4                   | 2630.1                   | 0.7                 |
|                           |                                           | 2601.3                   | 2602.3                   | 1.0                 |
|                           |                                           | 2597.2                   | 2592.4                   | -4.8                |
|                           | $2\nu_{16}(\text{a}_1)$                   | 2416.2                   | 2415.6                   | -0.6                |
|                           |                                           | 2354.5                   | 2355.2                   | 0.7                 |
|                           |                                           | 2095.3                   | 2092.8                   | -2.5                |
|                           |                                           | 2079.0                   | 2072.7                   | -6.3                |
|                           |                                           | 2023.1                   | 2020.5                   | -2.6                |
|                           |                                           | 1854.4                   | 1851.8                   | -2.6                |
|                           | $\nu_3(\text{a}_1)$                       | 1476.9                   | 1477.3                   | 0.4                 |
|                           | $\nu_{14}(\text{b}_1)$                    | 1459.2                   | 1459.3                   | 0.1                 |
|                           | $\nu_{19}(\text{b}_2)$                    | 1456.9                   | 1457.7                   | 0.8                 |
|                           | $\nu_5(\text{a}_1)$                       | 1246.1                   | 1247.5                   | 1.4                 |
|                           | $\nu_{20}(\text{b}_2)$                    | 1167.5                   | 1166.4                   | -1.1                |
|                           | $\nu_6(\text{a}_1)$                       | 1093.2                   | 1091.9                   | -1.3                |
|                           |                                           | 930.7                    | 929.2                    | -1.5                |
|                           |                                           | 920.3                    | 918.7                    | -1.6                |
| $\text{N}_2\text{O}$      | $2\nu_1 + 2\nu_2$                         | 3742.5                   | 3743.2                   | 0.7                 |
|                           | $\nu_1 + \nu_3$                           | 3474.6                   | 3486.9                   | 12.3                |
|                           | $2\nu_2 + \nu_3$                          | 3358.1                   | 3361.9                   | 3.8                 |
|                           | $2\nu_1$                                  | 2559.5                   | 2558.8                   | -0.7                |
|                           | $2\nu_1(^{15}\text{N}_1)$                 | 2531.1                   | 2531.9                   | 0.8                 |
|                           | $\nu_1 + 2\nu_2$                          | 2458.2                   | 2459.6                   | 1.4                 |
|                           | $\nu_3(\Sigma^-)$                         | 2220.2                   | 2227.9                   | 7.7                 |
|                           | $\nu_3^{15}\text{N}_2(\Sigma^-)$          | 2173.5                   | 2181.7                   | 8.2                 |
|                           | $\nu_1 + \nu_2$                           | 1877.9                   | 1870.1                   | -7.8                |
|                           | $\nu_1(\Sigma^+)$                         | 1283.2                   | 1286.3                   | 3.1                 |
|                           | $\nu_{2a}(\Pi)$                           | 588.4                    | 590.7                    | 2.3                 |
|                           | $\nu_{2b}(\Pi)$                           | 588.4                    | 584.8                    | -3.6                |

**Table S7.** Observed vibrational frequencies, in  $\text{cm}^{-1}$ , for the 1:1 complex of trimethyl amine with  $\text{N}_2\text{O}$ . For completeness, also the shifts induced by the complexation with the partner molecule are given.

|                           | Assignment                              | Monomer<br>$\tilde{\nu}$ | Complex<br>$\tilde{\nu}$ | $\Delta\tilde{\nu}$ |
|---------------------------|-----------------------------------------|--------------------------|--------------------------|---------------------|
| $\text{N}(\text{CH}_3)_3$ | $\nu_{12}(\text{e})$                    | 2979.7                   | 2981.3                   | 1.6                 |
|                           | $2(\nu_{20} + \nu_{21})$                | 2956.7                   | 2956.3                   | -0.4                |
|                           | $\nu_1(\text{a}_1), \nu_{13}(\text{e})$ | 2947.2                   | 2947.3                   | 0.1                 |
|                           | $2\nu_{17}$                             | 2820.6                   | 2823.3                   | 2.7                 |
|                           | $\nu_2(\text{a}_1), \nu_{14}(\text{e})$ | 2771.0                   | 2773.7                   | 2.7                 |
|                           | $\nu_{15} + \nu_{18}$                   | 2733.7                   | 2732.8                   | -0.9                |
|                           | $\nu_3 + \nu_5$                         | 2637.1                   | 2636.4                   | -0.7                |
|                           | $\nu_{16} + \nu_5$                      | 2626.0                   | 2629.1                   | 3.1                 |
|                           |                                         | 2589.0                   | 2591.9                   | 2.9                 |
|                           | $\nu_{15} + \nu_{20}$                   | 2495.5                   | 2497.5                   | 2.0                 |
|                           | $\nu_{18} + \nu_6$                      | 2098.9                   | 2096.9                   | -2.0                |
|                           |                                         | 2080.5                   | 2077.4                   | -3.1                |
|                           | $\nu_5 + \nu_6$                         | 2011.0                   | 2013.4                   | 2.4                 |
|                           | $\nu_{20} + \nu_6$                      | 1867.0                   | 1863.8                   | -3.2                |
|                           | $\nu_{20} + \nu_{21}$                   | 1475.9                   | 1475.3                   | -0.6                |
|                           | $\nu_{15}(\text{e})$                    | 1468.9                   | 1469.2                   | 0.3                 |
|                           | $\nu_3(\text{a}_1)$                     | 1456.1                   | 1455.9                   | -0.2                |
|                           | $\nu_{16}(\text{e})$                    | 1440.2                   | 1440.9                   | 0.7                 |
|                           | $\nu_{18}(\text{e})$                    | 1274.1                   | 1272.7                   | -1.4                |
|                           | $\nu_5(\text{a}_1)$                     | 1185.2                   | 1188.0                   | 2.8                 |
|                           | $\nu_{19}(\text{e})$                    | 1099.1                   | 1099.3                   | 0.2                 |
|                           | $\nu_{20}(\text{e})$                    | 1042.1                   | 1040.6                   | -1.5                |
|                           | $2\nu_{21}$                             | 852.0                    | 851.5                    | -0.5                |
|                           | $\nu_6(\text{a}_1)$                     | 828.4                    | 828.2                    | -0.2                |
| $\text{N}_2\text{O}$      | $3\nu_1$                                | 3830.9                   | 3835.3                   | 4.4                 |
|                           | $\nu_1 + \nu_3$                         | 3474.6                   | 3484.6                   | 10.0                |
|                           | $2\nu_2 + \nu_3$                        | 3358.1                   | 3359.4                   | 1.3                 |
|                           | $\nu_2 + \nu_3$                         | 2793.7                   | 2793.0                   | -0.7                |
|                           | $2\nu_1$                                | 2559.5                   | 2563.9                   | 4.4                 |
|                           | $\nu_1 + 2\nu_2$                        | 2458.2                   | 2457.9                   | -0.3                |
|                           | $\nu_3(\Sigma^-)$                       | 2220.2                   | 2226.2                   | 6.0                 |
|                           | $\nu_3^{15}\text{N}_1(\Sigma^-)$        | 2197.7                   | 2197.0                   | -0.7                |
|                           | $\nu_3^{15}\text{N}_2(\Sigma^-)$        | 2173.5                   | 2173.1                   | -0.4                |
|                           | $\nu_1 + \nu_2$                         | 1877.9                   | 1877.6                   | -0.3                |
|                           | $\nu_1(\Sigma^+)$                       | 1283.2                   | 1273.9                   | -9.3                |
|                           | $2\nu_2$                                | 1166.8                   | 1166.2                   | -0.6                |
|                           | $\nu_{2a}(\Pi)$                         | 588.2                    | 590.9                    | 2.7                 |
|                           | $\nu_{2b}(\Pi)$                         | 588.2                    | 578.0                    | -10.2               |

**Table S8.** Observed vibrational frequencies, in  $\text{cm}^{-1}$ , for the tetrel bonded 1:1 complex of dimethyl ether with OCS. For completeness, also the shifts induced by the complexation with the partner molecule are given. <sup>a</sup>

|                                  | Assignment                      | Monomer<br>$\tilde{\nu}$ | Complex<br>$\tilde{\nu}$ | $\Delta\tilde{\nu}$ |
|----------------------------------|---------------------------------|--------------------------|--------------------------|---------------------|
| CH <sub>3</sub> OCH <sub>3</sub> | $\nu_1(a_1), \nu_{12}(b_1)$     | 2994.0                   | 2996.8                   | 2.8                 |
|                                  |                                 | 2994.0                   | 2994.2                   | 0.2                 |
|                                  | $2\nu_3$                        | 2936.6                   | 2937.2                   | 0.6                 |
|                                  | $\nu_{18}(b_2)$                 | 2919.5                   | 2920.5                   | 1.0                 |
|                                  | $2\nu_{19}$                     | 2889.4                   | 2890.8                   | 1.4                 |
|                                  | $\nu_3 + \nu_{15}$              | 2883.6                   | 2886.2                   | 2.6                 |
|                                  | $\nu_{14} + \nu_{15}$           | 2869.7                   | 2871.4                   | 1.7                 |
|                                  | $\nu_{15} + \nu_{19}$           | 2867.7                   | 2868.9                   | 1.2                 |
|                                  | $\nu_2(a_1), \nu_{13}(b_1)$     | 2814.6                   | 2816.9                   | 2.3                 |
|                                  |                                 | 2700.0                   | 2702.5                   | 2.5                 |
|                                  |                                 | 2694.3                   | 2693.9                   | -0.4                |
|                                  |                                 | 2646.7                   | 2647.7                   | 1.0                 |
|                                  |                                 | 2622.2                   | 2622.7                   | 0.5                 |
|                                  |                                 | 2601.3                   | 2602.4                   | 1.1                 |
|                                  |                                 | 2597.2                   | 2601.2                   | 4.0                 |
|                                  |                                 | 2416.2                   | 2413.2                   | -3.0                |
|                                  |                                 | 2195.5                   | 2194.7                   | -0.8                |
|                                  | $\nu_3(a_1)$                    | 1476.9                   | 1476.1                   | -0.8                |
|                                  | $\nu_{14}(b_1)$                 | 1459.2                   | 1459.0                   | -0.2                |
|                                  | $\nu_{19}(b_2)$                 | 1456.9                   | 1456.8                   | -0.1                |
|                                  | $\nu_{15}(b_1)$                 | 1427.6                   | 1428.0                   | 0.4                 |
|                                  | $\nu_5(a_1)$                    | 1246.1                   | 1246.9                   | 0.8                 |
|                                  | $\nu_{16}(b_1), \nu_{20}(b_2)$  | 1173.6                   | 1173.5                   | -0.1                |
|                                  | $\nu_{17}(b_1)$                 | 1100.1                   | 1099.9                   | -0.2                |
|                                  |                                 | 1093.2                   | 1091.8                   | -1.4                |
|                                  | $\nu_6(a_1)$                    | 930.7                    | 927.4                    | -3.3                |
| OCS                              | $\nu_1 + 2\nu_3$                | 4935.9                   | 4934.6                   | -1.3                |
|                                  | $4\nu_2 + \nu_3$                | 4129.6                   | 4129.3                   | -0.3                |
|                                  | $2\nu_3$                        | 4082.8                   | 4082.5                   | -0.3                |
|                                  | $2\nu_3(^{18}\text{O})$         | 4011.7                   | 4014.2                   | 2.5                 |
|                                  | $2\nu_3(^{13}\text{C})$         | 3978.3                   | 3977.9                   | -0.4                |
|                                  | $\nu_1 + 2\nu_2 + \nu_3$        | 3927.2                   | 3926.9                   | -0.3                |
|                                  |                                 | 3761.4                   | 3761.7                   | 0.3                 |
|                                  | $2\nu_1 + \nu_3$                | 3756.9                   | 3756.7                   | -0.2                |
|                                  |                                 | 3703.2                   | 3700.5                   | -2.7                |
|                                  | $2\nu_2 + \nu_3$                | 3085.6                   | 3085.3                   | -0.3                |
|                                  | $\nu_1 + 4\nu_2$                | 2933.9                   | 2937.1                   | 3.2                 |
|                                  | $\nu_1 + \nu_3$                 | 2908.7                   | 2909.0                   | 0.3                 |
|                                  | $\nu_1 + \nu_3(^{34}\text{S})$  | 2897.0                   | 2896.2                   | -0.8                |
|                                  | $\nu_1 + \nu_3(^{13}\text{C})$  | 2852.1                   | 2852.0                   | -0.1                |
|                                  | $\nu_1 + \nu_3(^{18}\text{O})$  | 2840.1                   | 2838.6                   | -1.5                |
|                                  | $2\nu_1 + 2\nu_2$               | 2729.3                   | 2729.6                   | 0.3                 |
|                                  |                                 | 2706.3                   | 2702.2                   | -4.1                |
|                                  | $\nu_2 + \nu_3$                 | 2565.7                   | 2564.9                   | -0.8                |
|                                  | $3\nu_1$                        | 2555.3                   | 2555.6                   | 0.3                 |
|                                  | $4\nu_2$                        | 2101.8                   | 2100.8                   | -0.1                |
|                                  |                                 | 1963.0                   | 1962.8                   | -0.2                |
|                                  | $\nu_1 + 2\nu_2$                | 1890.5                   | 1889.6                   | -0.9                |
|                                  | $\nu_1 + 2\nu_2(^{34}\text{S})$ | 1878.0                   | 1878.1                   | 0.1                 |
|                                  | $\nu_1 + 2\nu_2(^{13}\text{C})$ | 1855.2                   | 1855.3                   | 0.1                 |
|                                  | $2\nu_1$                        | 1710.6                   | 1710.8                   | 0.2                 |

|                                  |        |        |      |
|----------------------------------|--------|--------|------|
| $2\nu_1(^{13}\text{C})$          | 1701.7 | 1701.9 | 0.2  |
| $2\nu_1(^{34}\text{S})$          | 1688.3 | 1688.4 | 0.1  |
|                                  | 1529.1 | 1529.0 | -0.1 |
| $\nu_1 + \nu_2$                  | 1371.8 | 1371.9 | 0.1  |
| $2\nu_2$                         | 1045.5 | 1044.7 | -0.8 |
| $2\nu_2(^{13}\text{C})$          | 1014.7 | 1014.5 | -0.2 |
| $\nu_1(\Sigma^+)$                | 858.8  | 858.1  | -0.7 |
| $\nu_1(^{34}\text{S})(\Sigma^+)$ | 847.6  | 847.7  | 0.1  |
| $\nu_1(^{18}\text{O})(\Sigma^+)$ | 838.0  | 837.8  | -0.2 |
| $\nu_{2a}(\Pi)$                  | 519.9  | 526.1  | 6.2  |
| $\nu_{2b}(\Pi)$                  | 519.9  | 512.8  | -7.1 |

<sup>a</sup> no spectral features assigned to a chalcogen bonded complex were observed.

**Table S9.** Observed vibrational frequencies, in  $\text{cm}^{-1}$ , for the tetrel bonded 1:1 complex of trimethyl amine with OCS. For completeness, also the shifts induced by the complexation with the partner molecule are given. <sup>a</sup>

|                                  | Assignment                              | Monomer<br>$\tilde{\nu}$ | Complex<br>$\tilde{\nu}$ | $\Delta\tilde{\nu}$ |
|----------------------------------|-----------------------------------------|--------------------------|--------------------------|---------------------|
| N(CH <sub>3</sub> ) <sub>3</sub> | $\nu_{12}(\text{e})$                    | 2979.7                   | 2979.5                   | -0.2                |
|                                  | $2(\nu_{20} + \nu_{21})$                | 2956.7                   | 2955.9                   | -0.8                |
|                                  | $\nu_1(\text{a}_1), \nu_{13}(\text{e})$ | 2947.2                   | 2946.6                   | -0.6                |
|                                  | $2\nu_{17}$                             | 2820.6                   | 2823.9                   | 3.3                 |
|                                  | $\nu_2(\text{a}_1), \nu_{14}(\text{e})$ | 2771.0                   | 2773.6                   | 2.6                 |
|                                  | $\nu_{15} + \nu_{18}$                   | 2733.7                   | 2733.1                   | -0.6                |
|                                  |                                         | 2718.2                   | 2717.8                   | -0.4                |
|                                  | $\nu_3 + \nu_5$                         | 2637.1                   | 2639.0                   | 1.9                 |
|                                  | $\nu_{16} + \nu_5$                      | 2626.0                   | 2629.1                   | 3.1                 |
|                                  | $\nu_{15} + \nu_{20}$                   | 2495.5                   | 2496.1                   | 0.6                 |
|                                  | $\nu_{20} + \nu_6$                      | 1867.0                   | 1864.6                   | -2.4                |
|                                  |                                         | 1524.8                   | 1523.9                   | -0.9                |
|                                  | $\nu_{20} + \nu_{21}$                   | 1475.9                   | 1474.7                   | -1.2                |
|                                  | $\nu_{15}(\text{e})$                    | 1468.9                   | 1469.0                   | 0.1                 |
|                                  | $\nu_3(\text{a}_1)$                     | 1456.1                   | 1455.4                   | -0.7                |
|                                  | $\nu_{16}(\text{e})$                    | 1440.2                   | 1440.0                   | -0.2                |
|                                  | $\nu_{17}(\text{e})$                    | 1415.8                   | 1419.8                   | 4.0                 |
|                                  |                                         | 1294.2                   | 1291.0                   | -3.2                |
|                                  | $\nu_{18}(\text{e})$                    | 1274.1                   | 1272.5                   | -1.6                |
|                                  | $\nu_5(\text{a}_1)$                     | 1185.2                   | 1187.9                   | 2.7                 |
| N(CH <sub>3</sub> ) <sub>3</sub> | $\nu_{19}(\text{e})$                    | 1099.1                   | 1098.6                   | -0.5                |
|                                  | $\nu_{20}(\text{e})$                    | 1042.1                   | 1040.4                   | -1.7                |
|                                  | $\nu_6(\text{a}_1)$                     | 828.4                    | 827.3                    | -1.1                |
| OCS                              | $\nu_1 + 2\nu_2$                        | 4935.9                   | 4935.5                   | -0.4                |
|                                  | $4\nu_3 + \nu_2$                        | 4129.6                   | 4128.2                   | -1.4                |
|                                  | $2\nu_2$                                | 4082.8                   | 4081.9                   | -0.9                |
|                                  | $2\nu_2(^{18}\text{O})$                 | 4011.7                   | 4010.9                   | -0.8                |
|                                  | $2\nu_2(^{13}\text{C})$                 | 3978.3                   | 3977.1                   | -1.2                |
|                                  | $\nu_1 + 2\nu_3 + \nu_2$                | 3927.2                   | 3926.5                   | -0.7                |
|                                  |                                         | 3761.4                   | 3761.2                   | -0.2                |
|                                  | $2\nu_1 + \nu_2$                        | 3756.9                   | 3756.4                   | -0.5                |
|                                  |                                         | 3703.2                   | 3692.1                   | -11.1               |
|                                  | $\nu_2 + 2\nu_3$                        | 3085.6                   | 3084.8                   | -0.8                |
|                                  | $\nu_1 + \nu_2$                         | 2908.7                   | 2908.4                   | -0.3                |
|                                  | $\nu_1 + \nu_2(^{34}\text{S})$          | 2897.0                   | 2896.1                   | -0.9                |
|                                  | $\nu_1 + \nu_2(^{13}\text{C})$          | 2852.1                   | 2851.2                   | -0.9                |
|                                  | $\nu_2 + \nu_3$                         | 2565.7                   | 2565.3                   | -0.4                |
|                                  |                                         | 2558.7                   | 2560.9                   | 2.2                 |
|                                  | $3\nu_1$                                | 2555.3                   | 2555.7                   | 0.4                 |
|                                  | $4\nu_3$                                | 2101.8                   | 2101.5                   | -0.3                |
|                                  |                                         | 1963.0                   | 1962.4                   | -0.6                |
|                                  | $\nu_1 + 2\nu_3$                        | 1890.5                   | 1890.8                   | 0.3                 |
|                                  | $\nu_1 + 2\nu_3(^{34}\text{S})$         | 1878.0                   | 1877.9                   | -0.1                |
|                                  | $\nu_1 + 2\nu_3(^{13}\text{C})$         | 1855.2                   | 1855.1                   | -0.1                |
|                                  | $2\nu_1$                                | 1710.6                   | 1710.8                   | 0.2                 |
|                                  | $2\nu_1(^{13}\text{C})$                 | 1701.7                   | 1702.0                   | 0.3                 |
|                                  | $2\nu_1(^{34}\text{S})$                 | 1688.3                   | 1688.7                   | 0.4                 |
|                                  |                                         | 1529.1                   | 1529.0                   | -0.1                |



|                                  |        |        |       |
|----------------------------------|--------|--------|-------|
| $\nu_1 + \nu_3$                  | 1371.8 | 1372.9 | 1.1   |
| $2\nu_3$                         | 1045.5 | 1041.9 | -3.6  |
| $2\nu_3(^{13}\text{C})$          | 1014.7 | 1014.0 | -0.7  |
| $\nu_1(\Sigma^+)$                | 858.8  | 858.6  | -0.2  |
| $\nu_1(^{34}\text{S})(\Sigma^+)$ | 847.6  | 847.5  | -0.1  |
| $\nu_{3a}(\Pi)$                  | 519.9  | 528.9  | 9.0   |
| $\nu_{3b}(\Pi)$                  | 519.9  | 502.7  | -17.2 |

<sup>a</sup> no spectral features assigned to a chalcogen bonded complex were observed.

## 6. MP2/6-311++G(d,p) Calculated Harmonic Frequencies and Infrared Intensities with the Frequency Shifts Induced by the Complexation (Tables S10-S17).

**Table S10.** MP2/6-311++G(d,p) calculated harmonic vibrational frequencies, in  $\text{cm}^{-1}$ , and infrared intensities, in  $\text{km mol}^{-1}$ , obtained for the 1:1 complex of dimethyl ether with  $\text{N}_2\text{O}$ . For completeness, also the shifts induced by the complexation with the partner molecule are given. Where applicable, BSSE corrected derivatives were used.

|                           |                                     | Monomer       |       | Complex       |       | $\Delta\tilde{\nu}$ |
|---------------------------|-------------------------------------|---------------|-------|---------------|-------|---------------------|
|                           | Assignment                          | $\tilde{\nu}$ | Int   | $\tilde{\nu}$ | Int   |                     |
| $\text{CH}_3\text{OCH}_3$ | $\nu_1^{\text{DME}}(\text{a}_1)$    | 3185.0        | 21.3  | 3186.8        | 19.3  | 1.8                 |
|                           | $\nu_2^{\text{DME}}(\text{a}_1)$    | 3028.3        | 65.4  | 3032.5        | 70.2  | 4.2                 |
|                           | $\nu_3^{\text{DME}}(\text{a}_1)$    | 1541.7        | 1.7   | 1541.3        | 1.2   | -0.4                |
|                           | $\nu_4^{\text{DME}}(\text{a}_1)$    | 1507.7        | 0.4   | 1507.1        | 0.2   | -0.6                |
|                           | $\nu_5^{\text{DME}}(\text{a}_1)$    | 1283.3        | 6.1   | 1285.1        | 5.8   | 1.8                 |
|                           | $\nu_6^{\text{DME}}(\text{a}_1)$    | 968.6         | 40.5  | 966.6         | 48.1  | -2.0                |
|                           | $\nu_7^{\text{DME}}(\text{a}_1)$    | 422.8         | 1.8   | 423.9         | 2.4   | 1.1                 |
|                           | $\nu_8^{\text{DME}}(\text{a}_2)$    | 3091.9        | 0.0   | 3098.5        | 0.1   | 6.6                 |
|                           | $\nu_9^{\text{DME}}(\text{a}_2)$    | 1498.0        | 0.0   | 1499.3        | 0.0   | 1.3                 |
|                           | $\nu_{10}^{\text{DME}}(\text{a}_2)$ | 1177.3        | 0.0   | 1177.9        | 0.0   | 0.6                 |
|                           | $\nu_{11}^{\text{DME}}(\text{b}_1)$ | 198.6         | 0.0   | 200.5         | 0.0   | 1.9                 |
|                           | $\nu_{12}^{\text{DME}}(\text{b}_1)$ | 3184.4        | 26.6  | 3186.0        | 16.7  | 1.6                 |
|                           | $\nu_{13}^{\text{DME}}(\text{b}_1)$ | 3020.3        | 53.9  | 3025.0        | 49.1  | 4.7                 |
|                           | $\nu_{14}^{\text{DME}}(\text{b}_1)$ | 1521.8        | 13.0  | 1521.4        | 15.4  | -0.4                |
|                           | $\nu_{15}^{\text{DME}}(\text{b}_1)$ | 1482.1        | 3.4   | 1481.2        | 0.3   | -0.9                |
|                           | $\nu_{16}^{\text{DME}}(\text{b}_1)$ | 1225.3        | 109.2 | 1222.1        | 96.7  | -3.2                |
|                           | $\nu_{17}^{\text{DME}}(\text{b}_1)$ | 1138.9        | 27.7  | 1137.9        | 27.3  | -1.0                |
|                           | $\nu_{18}^{\text{DME}}(\text{b}_2)$ | 3086.0        | 119.3 | 3092.7        | 108.5 | 6.7                 |
|                           | $\nu_{19}^{\text{DME}}(\text{b}_2)$ | 1508.4        | 13.7  | 1509.9        | 13.2  | 1.5                 |
|                           | $\nu_{20}^{\text{DME}}(\text{b}_2)$ | 1212.4        | 8.1   | 1213.4        | 8.6   | 1.0                 |
|                           | $\nu_{21}^{\text{DME}}(\text{b}_2)$ | 261.9         | 6.8   | 262.7         | 6.2   | 0.8                 |

|                     |                                        |        |       |        |       |      |
|---------------------|----------------------------------------|--------|-------|--------|-------|------|
| N <sub>2</sub> O    | $\nu_1^{\text{N}_2\text{O}}(\Sigma^+)$ | 1285.6 | 10.8  | 1292.6 | 10.9  | 7.0  |
|                     | $\nu_{2a}^{\text{N}_2\text{O}}(\Pi)$   | 537.9  | 2.7   | 544.3  | 2.7   | 6.4  |
|                     | $\nu_{2b}^{\text{N}_2\text{O}}(\Pi)$   | 537.9  | 2.7   | 536.3  | 5.7   | -1.6 |
|                     | $\nu_3^{\text{N}_2\text{O}}(\Sigma^-)$ | 2243.0 | 366.0 | 2255.8 | 321.4 | 12.8 |
|                     |                                        |        |       |        |       |      |
| Van der Waals modes |                                        |        |       | 106.8  | 0.1   |      |
|                     |                                        |        |       | 83.0   | 0.0   |      |
|                     |                                        |        |       | 45.8   | 6.4   |      |
|                     |                                        |        |       | 52.6   | 0.7   |      |
|                     |                                        |        |       | 37.2   | 0.0   |      |

**Table S11.** MP2/6-311++G(d,p) calculated harmonic vibrational frequencies, in  $\text{cm}^{-1}$ , and infrared intensities,  $\text{km mol}^{-1}$ , obtained for the tetrel bonded 1:1 complex of dimethyl ether with OCS. For completeness, also the shifts induced by the complexation with the partner molecule are given. Where applicable, BSSE corrected derivatives were used.

|                           | Assignment                          | Monomer       |       | Complex       |       | $\Delta\tilde{\nu}$ |
|---------------------------|-------------------------------------|---------------|-------|---------------|-------|---------------------|
|                           |                                     | $\tilde{\nu}$ | Int   | $\tilde{\nu}$ | Int   |                     |
| $\text{CH}_3\text{OCH}_3$ | $\nu_1^{\text{DME}}(\text{a}_1)$    | 3185.0        | 21.3  | 3187.6        | 16.9  | 2.6                 |
|                           | $\nu_2^{\text{DME}}(\text{a}_1)$    | 3028.3        | 65.4  | 3030.9        | 76.8  | 2.6                 |
|                           | $\nu_3^{\text{DME}}(\text{a}_1)$    | 1541.7        | 1.7   | 1540.5        | 0.8   | -1.2                |
|                           | $\nu_4^{\text{DME}}(\text{a}_1)$    | 1507.7        | 0.4   | 1506.8        | 0.2   | -0.9                |
|                           | $\nu_5^{\text{DME}}(\text{a}_1)$    | 1283.3        | 6.1   | 1284.7        | 5.3   | 1.4                 |
|                           | $\nu_6^{\text{DME}}(\text{a}_1)$    | 968.6         | 40.5  | 966.6         | 52.9  | -2.0                |
|                           | $\nu_7^{\text{DME}}(\text{a}_1)$    | 422.8         | 1.8   | 423.9         | 2.7   | 1.1                 |
|                           | $\nu_8^{\text{DME}}(\text{a}_2)$    | 3091.9        | 0.0   | 3096.2        | 0.2   | 4.3                 |
|                           | $\nu_9^{\text{DME}}(\text{a}_2)$    | 1498.0        | 0.0   | 1498.6        | 0.1   | 0.6                 |
|                           | $\nu_{10}^{\text{DME}}(\text{a}_2)$ | 1177.3        | 0.0   | 1177.4        | 0.0   | 0.1                 |
|                           | $\nu_{11}^{\text{DME}}(\text{b}_1)$ | 198.6         | 0.0   | 200.3         | 0.0   | 1.7                 |
|                           | $\nu_{12}^{\text{DME}}(\text{b}_1)$ | 3184.4        | 26.6  | 3183.1        | 20.5  | -1.3                |
|                           | $\nu_{13}^{\text{DME}}(\text{b}_1)$ | 3020.3        | 53.9  | 3023.2        | 49.5  | 2.9                 |
|                           | $\nu_{14}^{\text{DME}}(\text{b}_1)$ | 1521.8        | 13.0  | 1521.0        | 16.0  | -0.8                |
|                           | $\nu_{15}^{\text{DME}}(\text{b}_1)$ | 1482.1        | 3.4   | 1480.8        | 0.1   | -1.3                |
|                           | $\nu_{16}^{\text{DME}}(\text{b}_1)$ | 1225.3        | 109.2 | 1222.7        | 90.1  | -2.6                |
|                           | $\nu_{17}^{\text{DME}}(\text{b}_1)$ | 1138.9        | 27.7  | 1138.3        | 24.8  | -0.6                |
|                           | $\nu_{18}^{\text{DME}}(\text{b}_2)$ | 3086.0        | 119.3 | 3090.4        | 108.9 | 4.4                 |
|                           | $\nu_{19}^{\text{DME}}(\text{b}_2)$ | 1508.4        | 13.7  | 1509.5        | 12.1  | 1.1                 |
|                           | $\nu_{20}^{\text{DME}}(\text{b}_2)$ | 1212.4        | 8.1   | 1212.9        | 8.6   | 0.5                 |
|                           | $\nu_{21}^{\text{DME}}(\text{b}_2)$ | 261.9         | 6.8   | 262.4         | 5.8   | 0.5                 |
| OCS                       | $\nu_1^{\text{COS}}(\Sigma^+)$      | 901.2         | 5.8   | 901.5         | 5.7   | 0.3                 |
|                           | $\nu_{2a}^{\text{COS}}(\Pi)$        | 495.0         | 0.9   | 498.0         | 0.9   | 3.0                 |

|                              |        |       |        |       |      |
|------------------------------|--------|-------|--------|-------|------|
| $v_{2b}^{\text{cos}}(\Pi)$   | 495.0  | 0.9   | 488.3  | 4.8   | -6.7 |
| $v_3^{\text{cos}}(\Sigma^-)$ | 2100.7 | 669.1 | 2104.7 | 628.9 | 4.0  |
| <hr/>                        |        |       |        |       |      |
| Van der Waals modes          |        |       | 82.7   | 0.1   |      |
|                              |        |       | 67.3   | 0.2   |      |
|                              |        |       | 41.9   | 0.8   |      |
|                              |        |       | 37.4   | 5.6   |      |
|                              |        |       | 25.6   | 0.7   |      |
| <hr/>                        |        |       |        |       |      |

**Table S12.** MP2/6-311++G(d,p) calculated harmonic vibrational frequencies, in  $\text{cm}^{-1}$ , and infrared intensities, in  $\text{km mol}^{-1}$ , obtained for the chalcogen bonded 1:1 complex of dimethyl ether with OCS. For completeness, also the shifts induced by the complexation with the partner molecule are given. Where applicable, BSSE corrected derivatives were used.

|                           | Assignment                          | Monomer |                | Complex |                | $\Delta\nu^a$ |
|---------------------------|-------------------------------------|---------|----------------|---------|----------------|---------------|
|                           |                                     | $\nu^a$ | $\text{Int}^b$ | $\nu^a$ | $\text{Int}^b$ |               |
| $\text{CH}_3\text{OCH}_3$ | $\nu_1^{\text{DME}}(\text{a}_1)$    | 3185.0  | 21.3           | 3184.5  | 24.0           | -0.5          |
|                           | $\nu_2^{\text{DME}}(\text{a}_1)$    | 3028.3  | 65.4           | 3031.9  | 80.0           | 3.6           |
|                           | $\nu_3^{\text{DME}}(\text{a}_1)$    | 1541.7  | 1.7            | 1541.2  | 0.4            | -0.5          |
|                           | $\nu_4^{\text{DME}}(\text{a}_1)$    | 1507.7  | 0.4            | 1508.0  | 13.1           | 0.3           |
|                           | $\nu_5^{\text{DME}}(\text{a}_1)$    | 1283.3  | 6.1            | 1284.4  | 6.1            | 1.1           |
|                           | $\nu_6^{\text{DME}}(\text{a}_1)$    | 968.6   | 40.5           | 965.3   | 64.0           | -3.3          |
|                           | $\nu_7^{\text{DME}}(\text{a}_1)$    | 422.8   | 1.8            | 422.8   | 3.1            | 0.0           |
|                           | $\nu_8^{\text{DME}}(\text{a}_2)$    | 3091.9  | 0.0            | 3098.1  | 0.0            | 6.2           |
|                           | $\nu_9^{\text{DME}}(\text{a}_2)$    | 1498.0  | 0.0            | 1497.5  | 0.0            | -0.5          |
|                           | $\nu_{10}^{\text{DME}}(\text{a}_2)$ | 1177.3  | 0.0            | 1176.9  | 0.0            | -0.4          |
|                           | $\nu_{11}^{\text{DME}}(\text{b}_1)$ | 198.6   | 0.0            | 196.9   | 0.0            | -1.7          |
|                           | $\nu_{12}^{\text{DME}}(\text{b}_1)$ | 3184.4  | 26.6           | 3183.8  | 22.1           | -0.6          |
|                           | $\nu_{13}^{\text{DME}}(\text{b}_1)$ | 3020.3  | 53.9           | 3024.7  | 51.4           | 4.4           |
|                           | $\nu_{14}^{\text{DME}}(\text{b}_1)$ | 1521.8  | 13.0           | 1521.6  | 13.4           | -0.2          |
|                           | $\nu_{15}^{\text{DME}}(\text{b}_1)$ | 1482.1  | 3.4            | 1482.2  | 1.9            | 0.1           |
|                           | $\nu_{16}^{\text{DME}}(\text{b}_1)$ | 1225.3  | 109.2          | 1222.8  | 103.2          | -2.5          |
|                           | $\nu_{17}^{\text{DME}}(\text{b}_1)$ | 1138.9  | 27.7           | 1138.3  | 29.0           | -0.6          |
|                           | $\nu_{18}^{\text{DME}}(\text{b}_2)$ | 3086.0  | 119.3          | 3092.3  | 106.5          | 6.3           |
|                           | $\nu_{19}^{\text{DME}}(\text{b}_2)$ | 1508.4  | 13.7           | 1508.2  | 0.6            | -0.2          |
|                           | $\nu_{20}^{\text{DME}}(\text{b}_2)$ | 1212.4  | 8.1            | 1212.4  | 8.4            | 0.0           |
|                           | $\nu_{21}^{\text{DME}}(\text{b}_2)$ | 261.9   | 6.8            | 260.3   | 6.1            | -1.6          |
|                           |                                     |         |                |         |                |               |
| OCS                       | $\nu_1^{\text{SCO}}(\Sigma^+)$      | 901.2   | 5.8            | 894.7   | 1.5            | -6.5          |

|                              |        |       |        |       |       |
|------------------------------|--------|-------|--------|-------|-------|
| $v_{2a}^{\text{SCO}}(\Pi)$   | 495.0  | 0.9   | 504.2  | 0.9   | 9.2   |
| $v_{2b}^{\text{SCO}}(\Pi)$   | 495.0  | 0.9   | 502.4  | 0.8   | 7.4   |
| $v_3^{\text{SCO}}(\Sigma^-)$ | 2100.7 | 669.1 | 2089.3 | 737.8 | -11.4 |
| <hr/>                        |        |       |        |       |       |
| Van der Waals modes          |        |       | 55.9   | 0.4   |       |
|                              |        |       | 51.0   | 0.8   |       |
|                              |        |       | 41.0   | 3.5   |       |
|                              |        |       | 20.1   | 3.1   |       |
|                              |        |       | 5.1    | 0.4   |       |
| <hr/>                        |        |       |        |       |       |

**Table S13.** MP2/6-311++G(d,p) calculated harmonic vibrational frequencies, in  $\text{cm}^{-1}$ , and infrared intensities, in  $\text{km mol}^{-1}$ , obtained for 1:1 complex of trimethyl amine with  $^{12}\text{CO}_2$ . For completeness, also the shifts induced by the complexation with the partner molecule are given. Where applicable, BSSE corrected derivatives were used.

|                           |                                     | Monomer       |       | Complex       |       | $\Delta\tilde{\nu}$ |
|---------------------------|-------------------------------------|---------------|-------|---------------|-------|---------------------|
|                           | Assignment ·                        | $\tilde{\nu}$ | Int · | $\tilde{\nu}$ | Int · |                     |
| $\text{N}(\text{CH}_3)_3$ | $\nu_1^{\text{TMA}}(\text{a}_1)$    | 3114.1        | 42.3  | 3116.2        | 39.1  | 2.1                 |
|                           | $\nu_2^{\text{TMA}}(\text{a}_1)$    | 2970.4        | 179.7 | 2980.3        | 178.4 | 9.9                 |
|                           | $\nu_3^{\text{TMA}}(\text{a}_1)$    | 1521.8        | 24.9  | 1522.6        | 26.9  | 0.8                 |
|                           | $\nu_4^{\text{TMA}}(\text{a}_1)$    | 1492.3        | 0.3   | 1492.8        | 0.2   | 0.5                 |
|                           | $\nu_5^{\text{TMA}}(\text{a}_1)$    | 1228.3        | 25.4  | 1232.3        | 24.3  | 4.0                 |
|                           | $\nu_6^{\text{TMA}}(\text{a}_1)$    | 860.8         | 25.8  | 859.5         | 27.8  | -1.3                |
|                           | $\nu_7^{\text{TMA}}(\text{a}_1)$    | 389.4         | 8.6   | 396.8         | 12.8  | 7.4                 |
|                           | $\nu_8^{\text{TMA}}(\text{a}_2)$    | 3164.9        | 0.0   | 3163.2        | 9.1   | -1.7                |
|                           | $\nu_9^{\text{TMA}}(\text{a}_2)$    | 1507.3        | 0.0   | 1506.9        | 0.0   | -0.4                |
|                           | $\nu_{10}^{\text{TMA}}(\text{a}_2)$ | 1076.3        | 0.0   | 1076.5        | 0.0   | 0.2                 |
|                           | $\nu_{11}^{\text{TMA}}(\text{a}_2)$ | 240.9         | 0.0   | 237.0         | 0.0   | -3.9                |
|                           | $\nu_{12a}^{\text{TMA}}(\text{e})$  | 3168.0        | 35.4  | 3169.2        | 30.9  | 1.2                 |
|                           | $\nu_{12b}^{\text{TMA}}(\text{e})$  | 3168.0        | 35.4  | 3167.6        | 18.8  | -0.4                |
|                           | $\nu_{13a}^{\text{TMA}}(\text{e})$  | 3112.7        | 25.6  | 3115.2        | 16.3  | 2.5                 |
|                           | $\nu_{13b}^{\text{TMA}}(\text{e})$  | 3112.7        | 25.6  | 3110.5        | 26.8  | -2.2                |
|                           | $\nu_{14a}^{\text{TMA}}(\text{e})$  | 2962.1        | 46.1  | 2973.0        | 43.3  | 10.9                |
|                           | $\nu_{14b}^{\text{TMA}}(\text{e})$  | 2962.1        | 46.1  | 2973.0        | 42.7  | 10.9                |
|                           | $\nu_{15a}^{\text{TMA}}(\text{e})$  | 1529.5        | 9.7   | 1530.5        | 14.6  | 1.0                 |
|                           | $\nu_{15b}^{\text{TMA}}(\text{e})$  | 1529.5        | 9.7   | 1529.1        | 10.8  | -0.4                |
|                           | $\nu_{16a}^{\text{TMA}}(\text{e})$  | 1499.3        | 7.0   | 1500.3        | 5.2   | 1.0                 |
|                           | $\nu_{16b}^{\text{TMA}}(\text{e})$  | 1499.3        | 7.0   | 1499.0        | 3.5   | -0.3                |
|                           | $\nu_{17a}^{\text{TMA}}(\text{e})$  | 1454.5        | 0.5   | 1454.8        | 0.0   | 0.3                 |
|                           | $\nu_{17b}^{\text{TMA}}(\text{e})$  | 1454.5        | 0.5   | 1453.9        | 0.1   | -0.6                |
|                           | $\nu_{18a}^{\text{TMA}}(\text{e})$  | 1325.7        | 15.4  | 1325.4        | 12.5  | -0.3                |



|                     |                                   |        |       |        |       |       |
|---------------------|-----------------------------------|--------|-------|--------|-------|-------|
|                     | $v_{18b}^{\text{TMA}}(\text{e})$  | 1325.7 | 15.4  | 1323.1 | 14.3  | -2.6  |
|                     | $v_{19a}^{\text{TMA}}(\text{e})$  | 1137.8 | 8.6   | 1136.9 | 6.9   | -0.9  |
|                     | $v_{19b}^{\text{TMA}}(\text{e})$  | 1137.8 | 8.6   | 1136.6 | 8.1   | -1.2  |
|                     | $v_{20a}^{\text{TMA}}(\text{e})$  | 1082.6 | 15.6  | 1081.0 | 15.7  | -1.6  |
|                     | $v_{20b}^{\text{TMA}}(\text{e})$  | 1082.6 | 15.6  | 1081.0 | 14.4  | -1.6  |
|                     | $v_{21a}^{\text{TMA}}(\text{e})$  | 423.4  | 0.0   | 423.0  | 0.0   | -0.4  |
|                     | $v_{21b}^{\text{TMA}}(\text{e})$  | 423.4  | 0.0   | 422.8  | 0.0   | -0.6  |
|                     | $v_{22a}^{\text{TMA}}(\text{e})$  | 289.4  | 0.5   | 290.2  | 0.6   | 0.8   |
|                     | $v_{22b}^{\text{TMA}}(\text{e})$  | 289.4  | 0.5   | 284.6  | 0.4   | -4.8  |
| <hr/>               |                                   |        |       |        |       |       |
| $^{12}\text{CO}_2$  | $v_1^{12}\text{CO}_2(\Sigma_g^+)$ | 1335.4 | 0.0   | 1334.8 | 1.0   | -0.6  |
|                     | $v_{2a}^{12}\text{CO}_2(\Pi_g)$   | 655.2  | 24.7  | 661.1  | 19.0  | 5.9   |
|                     | $v_{2b}^{12}\text{CO}_2(\Pi_u)$   | 655.2  | 24.7  | 625.0  | 67.9  | -30.2 |
|                     | $v_3^{12}\text{CO}_2(\Sigma_u^+)$ | 2432.7 | 603.9 | 2429.2 | 500.0 | -3.5  |
| <hr/>               |                                   |        |       |        |       |       |
| Van der Waals modes |                                   |        |       | 127.5  | 0.2   |       |
|                     |                                   |        |       | 75.0   | 0.4   |       |
|                     |                                   |        |       | 42.6   | 0.1   |       |
|                     |                                   |        |       | 40.5   | 0.1   |       |
|                     |                                   |        |       | 7.0    | 0.0   |       |
| <hr/>               |                                   |        |       |        |       |       |

**Table S14.** MP2/6-311++G(d,p) calculated harmonic vibrational frequencies, in  $\text{cm}^{-1}$ , and infrared intensities, in  $\text{km mol}^{-1}$ , obtained for the 1:1 complex of trimethyl ether with  $^{13}\text{CO}_2$ . For completeness, also the shifts induced by the complexation with the partner molecule are given. Where applicable, BSSE corrected derivatives were used.

|                           |                                     | Monomer       |       | Complex       |       | $\Delta\tilde{\nu}$ |
|---------------------------|-------------------------------------|---------------|-------|---------------|-------|---------------------|
|                           | Assignment ·                        | $\tilde{\nu}$ | Int · | $\tilde{\nu}$ | Int · |                     |
| $\text{N}(\text{CH}_3)_3$ | $\nu_1^{\text{TMA}}(\text{a}_1)$    | 3114.1        | 42.3  | 3116.2        | 39.1  | 2.1                 |
|                           | $\nu_2^{\text{TMA}}(\text{a}_1)$    | 2970.4        | 179.7 | 2980.3        | 178.4 | 9.9                 |
|                           | $\nu_3^{\text{TMA}}(\text{a}_1)$    | 1521.8        | 24.9  | 1522.6        | 26.8  | 0.8                 |
|                           | $\nu_4^{\text{TMA}}(\text{a}_1)$    | 1492.3        | 0.3   | 1492.8        | 0.2   | 0.5                 |
|                           | $\nu_5^{\text{TMA}}(\text{a}_1)$    | 1228.3        | 25.4  | 1232.3        | 24.3  | 4.0                 |
|                           | $\nu_6^{\text{TMA}}(\text{a}_1)$    | 860.8         | 25.8  | 859.4         | 28.1  | -1.4                |
|                           | $\nu_7^{\text{TMA}}(\text{a}_1)$    | 389.4         | 8.6   | 396.8         | 12.9  | 7.4                 |
|                           | $\nu_8^{\text{TMA}}(\text{a}_2)$    | 3164.9        | 0.0   | 3163.2        | 9.0   | -1.7                |
|                           | $\nu_9^{\text{TMA}}(\text{a}_2)$    | 1507.3        | 0.0   | 1506.9        | 0.0   | -0.4                |
|                           | $\nu_{10}^{\text{TMA}}(\text{a}_2)$ | 1076.3        | 0.0   | 1076.5        | 0.0   | 0.2                 |
|                           | $\nu_{11}^{\text{TMA}}(\text{a}_2)$ | 240.9         | 0.0   | 237.0         | 0.0   | -3.9                |
|                           | $\nu_{12a}^{\text{TMA}}(\text{e})$  | 3168.0        | 35.4  | 3169.2        | 30.9  | 1.2                 |
|                           | $\nu_{12b}^{\text{TMA}}(\text{e})$  | 3168.0        | 35.4  | 3167.6        | 18.7  | -0.4                |
|                           | $\nu_{13a}^{\text{TMA}}(\text{e})$  | 3112.7        | 25.6  | 3115.2        | 16.2  | 2.5                 |
|                           | $\nu_{13b}^{\text{TMA}}(\text{e})$  | 3112.7        | 25.6  | 3110.5        | 26.8  | -2.2                |
|                           | $\nu_{14a}^{\text{TMA}}(\text{e})$  | 2962.1        | 46.1  | 2973.0        | 43.3  | 10.9                |
|                           | $\nu_{14b}^{\text{TMA}}(\text{e})$  | 2962.1        | 46.1  | 2973.0        | 42.7  | 10.9                |
|                           | $\nu_{15a}^{\text{TMA}}(\text{e})$  | 1529.5        | 9.7   | 1530.4        | 14.7  | 0.9                 |
|                           | $\nu_{15b}^{\text{TMA}}(\text{e})$  | 1529.5        | 9.7   | 1529.1        | 10.8  | -0.4                |
|                           | $\nu_{16a}^{\text{TMA}}(\text{e})$  | 1499.3        | 7.0   | 1500.3        | 5.2   | 1.0                 |
|                           | $\nu_{16b}^{\text{TMA}}(\text{e})$  | 1499.3        | 7.0   | 1499.0        | 3.4   | -0.3                |
|                           | $\nu_{17a}^{\text{TMA}}(\text{e})$  | 1454.5        | 0.5   | 1454.8        | 0.0   | 0.3                 |
|                           | $\nu_{17b}^{\text{TMA}}(\text{e})$  | 1454.5        | 0.5   | 1453.9        | 0.1   | -0.6                |
|                           | $\nu_{18a}^{\text{TMA}}(\text{e})$  | 1325.7        | 15.4  | 1325.4        | 12.5  | -0.3                |

|                     |                                       |        |       |        |       |       |
|---------------------|---------------------------------------|--------|-------|--------|-------|-------|
|                     | $v_{18b}^{TMA} (e)$                   | 1325.7 | 15.4  | 1323.1 | 14.3  | -2.6  |
|                     | $v_{19a}^{TMA} (e)$                   | 1137.8 | 8.6   | 1136.9 | 6.9   | -0.9  |
|                     | $v_{19b}^{TMA} (e)$                   | 1137.8 | 8.6   | 1136.6 | 8.1   | -1.2  |
|                     | $v_{20a}^{TMA} (e)$                   | 1082.6 | 15.6  | 1081.0 | 15.7  | -1.6  |
|                     | $v_{20b}^{TMA} (e)$                   | 1082.6 | 15.6  | 1081.0 | 14.4  | -1.6  |
|                     | $v_{21a}^{TMA} (e)$                   | 423.4  | 0.0   | 423.0  | 0.0   | -0.4  |
|                     | $v_{21b}^{TMA} (e)$                   | 423.4  | 0.0   | 422.8  | 0.0   | -0.6  |
|                     | $v_{22a}^{TMA} (e)$                   | 289.4  | 0.5   | 290.2  | 0.6   | 0.8   |
|                     | $v_{22b}^{TMA} (e)$                   | 289.4  | 0.5   | 284.6  | 0.4   | -4.8  |
| <hr/>               |                                       |        |       |        |       |       |
| $^{13}\text{CO}_2$  | $v_1^{^{13}\text{CO}_2} (\Sigma_g^+)$ | 1335.4 | 0.0   | 1334.8 | 0.9   | -0.6  |
|                     | $v_{2a}^{^{13}\text{CO}_2} (\Pi_g)$   | 636.5  | 23.3  | 642.1  | 18.0  | 5.6   |
|                     | $v_{2b}^{^{13}\text{CO}_2} (\Pi_u)$   | 636.5  | 23.3  | 607.7  | 63.5  | -28.8 |
|                     | $v_3^{^{13}\text{CO}_2} (\Sigma_u^+)$ | 2363.5 | 570.0 | 2359.9 | 472.6 | -3.6  |
| <hr/>               |                                       |        |       |        |       |       |
| Van der Waals modes |                                       |        |       | 127.5  | 0.2   |       |
|                     |                                       |        |       | 75.0   | 0.4   |       |
|                     |                                       |        |       | 42.6   | 0.1   |       |
|                     |                                       |        |       | 40.5   | 0.1   |       |
|                     |                                       |        |       | 7.0    | 0.0   |       |
| <hr/>               |                                       |        |       |        |       |       |

**Table S15.** MP2/6-311++G(d,p) calculated harmonic vibrational frequencies, in  $\text{cm}^{-1}$ , and infrared intensities, in  $\text{km mol}^{-1}$ , obtained for the 1:1 complex of trimethyl amine with  $\text{N}_2\text{O}$ . For completeness, also the shifts induced by the complexation with the partner molecule are given. Where applicable, BSSE corrected derivatives were used.

|                           |                                     | Monomer       |       | Complex       |       | $\Delta\tilde{\nu}$ |
|---------------------------|-------------------------------------|---------------|-------|---------------|-------|---------------------|
|                           | Assignment ·                        | $\tilde{\nu}$ | Int · | $\tilde{\nu}$ | Int · |                     |
| $\text{N}(\text{CH}_3)_3$ | $\nu_1^{\text{TMA}}(\text{a}_1)$    | 3114.1        | 42.3  | 3108.6        | 28.5  | -5.5                |
|                           | $\nu_2^{\text{TMA}}(\text{a}_1)$    | 2970.4        | 179.7 | 2976.4        | 179.6 | 6.0                 |
|                           | $\nu_3^{\text{TMA}}(\text{a}_1)$    | 1521.8        | 24.9  | 1522.3        | 27.3  | 0.5                 |
|                           | $\nu_4^{\text{TMA}}(\text{a}_1)$    | 1492.3        | 0.3   | 1492.6        | 0.4   | 0.3                 |
|                           | $\nu_5^{\text{TMA}}(\text{a}_1)$    | 1228.3        | 25.4  | 1230.6        | 24.7  | 2.3                 |
|                           | $\nu_6^{\text{TMA}}(\text{a}_1)$    | 860.8         | 25.8  | 859.6         | 28.6  | -1.2                |
|                           | $\nu_7^{\text{TMA}}(\text{a}_1)$    | 389.4         | 8.6   | 393.4         | 9.2   | 4.0                 |
|                           | $\nu_8^{\text{TMA}}(\text{a}_2)$    | 3164.9        | 0.0   | 3161.5        | 9.6   | -3.4                |
|                           | $\nu_9^{\text{TMA}}(\text{a}_2)$    | 1507.3        | 0.0   | 1507.0        | 0.0   | -0.3                |
|                           | $\nu_{10}^{\text{TMA}}(\text{a}_2)$ | 1076.3        | 0.0   | 1076.3        | 0.0   | 0.0                 |
|                           | $\nu_{11}^{\text{TMA}}(\text{a}_2)$ | 240.9         | 0.0   | 239.1         | 0.0   | -1.8                |
|                           | $\nu_{12a}^{\text{TMA}}(\text{e})$  | 3168.0        | 35.4  | 3167.8        | 32.5  | -0.2                |
|                           | $\nu_{12b}^{\text{TMA}}(\text{e})$  | 3168.0        | 35.4  | 3166.2        | 17.6  | -1.8                |
|                           | $\nu_{13a}^{\text{TMA}}(\text{e})$  | 3112.7        | 25.6  | 3114.4        | 38.2  | 1.7                 |
|                           | $\nu_{13b}^{\text{TMA}}(\text{e})$  | 3112.7        | 25.6  | 3113.3        | 18.8  | 0.6                 |
|                           | $\nu_{14a}^{\text{TMA}}(\text{e})$  | 2962.1        | 46.1  | 2969.0        | 45.0  | 6.9                 |
|                           | $\nu_{14b}^{\text{TMA}}(\text{e})$  | 2962.1        | 46.1  | 2968.4        | 44.3  | 6.3                 |
|                           | $\nu_{15a}^{\text{TMA}}(\text{e})$  | 1529.5        | 9.7   | 1530.1        | 15.4  | 0.6                 |
|                           | $\nu_{15b}^{\text{TMA}}(\text{e})$  | 1529.5        | 9.7   | 1529.2        | 10.3  | -0.3                |
|                           | $\nu_{16a}^{\text{TMA}}(\text{e})$  | 1499.3        | 7.0   | 1500.2        | 5.1   | 0.9                 |
|                           | $\nu_{16b}^{\text{TMA}}(\text{e})$  | 1499.3        | 7.0   | 1498.9        | 3.7   | -0.4                |
|                           | $\nu_{17a}^{\text{TMA}}(\text{e})$  | 1454.5        | 0.5   | 1454.4        | 0.0   | -0.1                |
|                           | $\nu_{17b}^{\text{TMA}}(\text{e})$  | 1454.5        | 0.5   | 1453.6        | 0.2   | -1.1                |

|                     |                                        |        |       |        |       |       |
|---------------------|----------------------------------------|--------|-------|--------|-------|-------|
|                     | $\nu_{18a}^{\text{TMA}}(\text{e})$     | 1325.7 | 15.4  | 1325.3 | 12.9  | -0.4  |
|                     | $\nu_{18b}^{\text{TMA}}(\text{e})$     | 1325.7 | 15.4  | 1323.9 | 14.8  | -1.8  |
|                     | $\nu_{19a}^{\text{TMA}}(\text{e})$     | 1137.8 | 8.6   | 1137.2 | 7.0   | -0.6  |
|                     | $\nu_{19b}^{\text{TMA}}(\text{e})$     | 1137.8 | 8.6   | 1136.7 | 8.3   | -1.1  |
|                     | $\nu_{20a}^{\text{TMA}}(\text{e})$     | 1082.6 | 15.6  | 1081.9 | 15.0  | -0.7  |
|                     | $\nu_{20b}^{\text{TMA}}(\text{e})$     | 1082.6 | 15.6  | 1081.3 | 15.0  | -1.3  |
|                     | $\nu_{21a}^{\text{TMA}}(\text{e})$     | 423.4  | 0.0   | 423.2  | 0.0   | -0.2  |
|                     | $\nu_{21b}^{\text{TMA}}(\text{e})$     | 423.4  | 0.0   | 422.7  | 0.0   | -0.7  |
|                     | $\nu_{22a}^{\text{TMA}}(\text{e})$     | 289.4  | 0.5   | 290.1  | 0.6   | 0.7   |
|                     | $\nu_{22b}^{\text{TMA}}(\text{e})$     | 289.4  | 0.5   | 286.6  | 0.4   | -2.8  |
| <hr/>               |                                        |        |       |        |       |       |
| N <sub>2</sub> O    | $\nu_1^{\text{N}_2\text{O}}(\Sigma^+)$ | 1285.6 | 10.8  | 1291.3 | 8.9   | 5.7   |
|                     | $\nu_{2a}^{\text{N}_2\text{O}}(\Pi)$   | 537.9  | 2.7   | 543.3  | 2.3   | 5.4   |
|                     | $\nu_{2b}^{\text{N}_2\text{O}}(\Pi)$   | 537.9  | 2.7   | 525.3  | 6.5   | -12.6 |
|                     | $\nu_3^{\text{N}_2\text{O}}(\Sigma^-)$ | 2243.0 | 366.0 | 2254.1 | 296.0 | 11.1  |
| <hr/>               |                                        |        |       |        |       |       |
| Van der Waals modes |                                        |        |       | 102.8  | 0.3   |       |
|                     |                                        |        |       | 72.3   | 0.0   |       |
|                     |                                        |        |       | 36.9   | 0.2   |       |
|                     |                                        |        |       | 31.9   | 0.1   |       |
|                     |                                        |        |       | 7.3    | 0.1   |       |
| <hr/>               |                                        |        |       |        |       |       |

**Table S16.** MP2/6-311++G(d,p) calculated harmonic vibrational frequencies, in  $\text{cm}^{-1}$ , and infrared intensities, in  $\text{km mol}^{-1}$ , obtained for the tetrel bonded 1:1 complex of dimethyl ether with OCS. For completeness, also the shifts induced by the complexation with the partner molecule are given. Where applicable, BSSE corrected derivatives were used.

|                           |                                     | Monomer       |       | Complex       |       | $\Delta\tilde{\nu}$ |
|---------------------------|-------------------------------------|---------------|-------|---------------|-------|---------------------|
| Assignment                |                                     | $\tilde{\nu}$ | Int   | $\tilde{\nu}$ | Int   |                     |
| $\text{N}(\text{CH}_3)_3$ | $\nu_1^{\text{TMA}}(\text{a}_1)$    | 3114.1        | 42.3  | 3109.9        | 22.1  | -4.2                |
|                           | $\nu_2^{\text{TMA}}(\text{a}_1)$    | 2970.4        | 179.7 | 2973.9        | 200.0 | 3.5                 |
|                           | $\nu_3^{\text{TMA}}(\text{a}_1)$    | 1521.8        | 24.9  | 1521.8        | 27.7  | 0.0                 |
|                           | $\nu_4^{\text{TMA}}(\text{a}_1)$    | 1492.3        | 0.3   | 1492.3        | 0.4   | 0.0                 |
|                           | $\nu_5^{\text{TMA}}(\text{a}_1)$    | 1228.3        | 25.4  | 1229.5        | 24.1  | 1.2                 |
|                           | $\nu_6^{\text{TMA}}(\text{a}_1)$    | 860.8         | 25.8  | 859.5         | 33.6  | -1.3                |
|                           | $\nu_7^{\text{TMA}}(\text{a}_1)$    | 389.4         | 8.6   | 390.5         | 11.8  | 1.1                 |
|                           | $\nu_8^{\text{TMA}}(\text{a}_2)$    | 3164.9        | 0.0   | 3162.4        | 1.5   | -2.5                |
|                           | $\nu_9^{\text{TMA}}(\text{a}_2)$    | 1507.3        | 0.0   | 1506.8        | 0.0   | -0.5                |
|                           | $\nu_{10}^{\text{TMA}}(\text{a}_2)$ | 1076.3        | 0.0   | 1076.5        | 0.0   | 0.2                 |
|                           | $\nu_{11}^{\text{TMA}}(\text{a}_2)$ | 240.9         | 0.0   | 239.2         | 0.0   | -1.7                |
|                           | $\nu_{12a}^{\text{TMA}}(\text{e})$  | 3168.0        | 35.4  | 3166.5        | 27.5  | -1.5                |
|                           | $\nu_{12b}^{\text{TMA}}(\text{e})$  | 3168.0        | 35.4  | 3165.1        | 28.7  | -2.9                |
|                           | $\nu_{13a}^{\text{TMA}}(\text{e})$  | 3112.7        | 25.6  | 3112.6        | 39.1  | -0.1                |
|                           | $\nu_{13b}^{\text{TMA}}(\text{e})$  | 3112.7        | 25.6  | 3111.0        | 23.4  | -1.7                |
|                           | $\nu_{14a}^{\text{TMA}}(\text{e})$  | 2962.1        | 46.1  | 2966.4        | 45.5  | 4.3                 |
|                           | $\nu_{14b}^{\text{TMA}}(\text{e})$  | 2962.1        | 46.1  | 2965.8        | 44.9  | 3.7                 |
|                           | $\nu_{15a}^{\text{TMA}}(\text{e})$  | 1529.5        | 9.7   | 1529.6        | 17.3  | 0.1                 |
|                           | $\nu_{15b}^{\text{TMA}}(\text{e})$  | 1529.5        | 9.7   | 1529.3        | 11.4  | -0.2                |
|                           | $\nu_{16a}^{\text{TMA}}(\text{e})$  | 1499.3        | 7.0   | 1499.7        | 4.6   | -0.4                |
|                           | $\nu_{16b}^{\text{TMA}}(\text{e})$  | 1499.3        | 7.0   | 1498.3        | 2.3   | -1.0                |
|                           | $\nu_{17a}^{\text{TMA}}(\text{e})$  | 1454.5        | 0.5   | 1453.9        | 0.1   | -0.6                |
|                           | $\nu_{17b}^{\text{TMA}}(\text{e})$  | 1454.5        | 0.5   | 1453.6        | 0.2   | -0.9                |
|                           | $\nu_{18a}^{\text{TMA}}(\text{e})$  | 1325.7        | 15.4  | 1326.7        | 12.1  | 1.0                 |

|                     |                              |        |       |        |       |       |
|---------------------|------------------------------|--------|-------|--------|-------|-------|
|                     | $v_{18b}^{TMA}(\mathbf{e})$  | 1325.7 | 15.4  | 1325.3 | 14.6  | -0.4  |
|                     | $v_{19a}^{TMA}(\mathbf{e})$  | 1137.8 | 8.6   | 1136.8 | 8.1   | -1.0  |
|                     | $v_{19b}^{TMA}(\mathbf{e})$  | 1137.8 | 8.6   | 1136.4 | 7.2   | -1.4  |
|                     | $v_{20a}^{TMA}(\mathbf{e})$  | 1082.6 | 15.6  | 1083.0 | 13.4  | 0.4   |
|                     | $v_{20b}^{TMA}(\mathbf{e})$  | 1082.6 | 15.6  | 1082.4 | 15.1  | -0.2  |
|                     | $v_{21a}^{TMA}(\mathbf{e})$  | 423.4  | 0.0   | 423.4  | 0.1   | 0.0   |
|                     | $v_{21b}^{TMA}(\mathbf{e})$  | 423.4  | 0.0   | 422.9  | 0.0   | -0.5  |
|                     | $v_{22a}^{TMA}(\mathbf{e})$  | 289.4  | 0.5   | 288.6  | 0.6   | -0.8  |
|                     | $v_{22b}^{TMA}(\mathbf{e})$  | 289.4  | 0.5   | 286.3  | 0.5   | -3.1  |
| <hr/>               |                              |        |       |        |       |       |
| OCS                 | $v_1^{\text{COS}}(\Sigma^+)$ | 901.2  | 5.8   | 900.3  | 5.5   | -0.9  |
|                     | $v_{2a}^{\text{COS}}(\Pi)$   | 495.0  | 0.9   | 499.5  | 0.6   | 4.5   |
|                     | $v_{2b}^{\text{COS}}(\Pi)$   | 495.0  | 0.9   | 478.0  | 7.9   | -17.0 |
|                     | $v_3^{\text{COS}}(\Sigma^-)$ | 2100.7 | 669.1 | 2101.2 | 595.8 | 0.5   |
| <hr/>               |                              |        |       |        |       |       |
| Van der Waals modes |                              |        |       | 86.1   | 0.3   |       |
|                     |                              |        |       | 63.6   | 0.0   |       |
|                     |                              |        |       | 38.2   | 0.2   |       |
|                     |                              |        |       | 35.5   | 0.2   |       |
|                     |                              |        |       | 5.1    | 0.3   |       |

**Table S17.** MP2/6-311++G(d,p) calculated harmonic vibrational frequencies, in  $\text{cm}^{-1}$ , and infrared intensities, in  $\text{km mol}^{-1}$ , obtained for the chalcogen bonded 1:1 complex of dimethyl ether with OCS. For completeness, also the shifts induced by the complexation with the partner molecule are given. Where applicable, BSSE corrected derivatives were used.

|                           |                                     | Monomer       |       | Complex       |       | $\Delta\tilde{\nu}$ |
|---------------------------|-------------------------------------|---------------|-------|---------------|-------|---------------------|
|                           | Assignment                          | $\tilde{\nu}$ | Int   | $\tilde{\nu}$ | Int   |                     |
| $\text{N}(\text{CH}_3)_3$ | $\nu_1^{\text{TMA}}(\text{a}_1)$    | 3114.1        | 42.3  | 3113.5        | 46.3  | -0.6                |
|                           | $\nu_2^{\text{TMA}}(\text{a}_1)$    | 2970.4        | 179.7 | 2976.4        | 208.5 | 6.0                 |
|                           | $\nu_3^{\text{TMA}}(\text{a}_1)$    | 1521.8        | 24.9  | 1521.2        | 31.0  | -0.6                |
|                           | $\nu_4^{\text{TMA}}(\text{a}_1)$    | 1492.3        | 0.3   | 1492.7        | 0.1   | 0.4                 |
|                           | $\nu_5^{\text{TMA}}(\text{a}_1)$    | 1228.3        | 25.4  | 1230.0        | 24.4  | 1.7                 |
|                           | $\nu_6^{\text{TMA}}(\text{a}_1)$    | 860.8         | 25.8  | 858.3         | 39.8  | -2.5                |
|                           | $\nu_7^{\text{TMA}}(\text{a}_1)$    | 389.4         | 8.6   | 392.0         | 14.3  | 2.6                 |
|                           | $\nu_8^{\text{TMA}}(\text{a}_2)$    | 3164.9        | 0.0   | 3163.3        | 0.5   | -1.6                |
|                           | $\nu_9^{\text{TMA}}(\text{a}_2)$    | 1507.3        | 0.0   | 1506.9        | 0.0   | -0.4                |
|                           | $\nu_{10}^{\text{TMA}}(\text{a}_2)$ | 1076.3        | 0.0   | 1076.0        | 0.0   | -0.3                |
|                           | $\nu_{11}^{\text{TMA}}(\text{a}_2)$ | 240.9         | 0.0   | 236.2         | 0.0   | -4.7                |
|                           | $\nu_{12a}^{\text{TMA}}(\text{e})$  | 3168.0        | 35.4  | 3166.9        | 31.8  | -1.1                |
|                           | $\nu_{12b}^{\text{TMA}}(\text{e})$  | 3168.0        | 35.4  | 3166.2        | 31.3  | -1.8                |
|                           | $\nu_{13a}^{\text{TMA}}(\text{e})$  | 3112.7        | 25.6  | 3112.2        | 24.6  | -0.5                |
|                           | $\nu_{13b}^{\text{TMA}}(\text{e})$  | 3112.7        | 25.6  | 3111.7        | 20.2  | -1.0                |
|                           | $\nu_{14a}^{\text{TMA}}(\text{e})$  | 2962.1        | 46.1  | 2969.1        | 43.8  | 7.0                 |
|                           | $\nu_{14b}^{\text{TMA}}(\text{e})$  | 2962.1        | 46.1  | 2968.8        | 44.7  | 6.7                 |
|                           | $\nu_{15a}^{\text{TMA}}(\text{e})$  | 1529.5        | 9.7   | 1529.6        | 11.2  | 0.1                 |
|                           | $\nu_{15b}^{\text{TMA}}(\text{e})$  | 1529.5        | 9.7   | 1529.6        | 11.7  | 0.1                 |
|                           | $\nu_{16a}^{\text{TMA}}(\text{e})$  | 1499.3        | 7.0   | 1498.6        | 5.6   | -0.7                |
| $\text{N}(\text{CH}_3)_3$ | $\nu_{16b}^{\text{TMA}}(\text{e})$  | 1499.3        | 7.0   | 1498.4        | 4.9   | -0.9                |
|                           | $\nu_{17a}^{\text{TMA}}(\text{e})$  | 1454.5        | 0.5   | 1454.3        | 0.2   | -0.2                |
|                           | $\nu_{17b}^{\text{TMA}}(\text{e})$  | 1454.5        | 0.5   | 1454.2        | 0.1   | -0.3                |



|                     |                                    |        |       |        |       |       |
|---------------------|------------------------------------|--------|-------|--------|-------|-------|
|                     | $\nu_{18a}^{\text{TMA}}(\text{e})$ | 1325.7 | 15.4  | 1325.2 | 14.6  | -0.5  |
|                     | $\nu_{18b}^{\text{TMA}}(\text{e})$ | 1325.7 | 15.4  | 1324.8 | 14.7  | -0.9  |
|                     | $\nu_{19a}^{\text{TMA}}(\text{e})$ | 1137.8 | 8.6   | 1136.3 | 8.0   | -1.5  |
|                     | $\nu_{19b}^{\text{TMA}}(\text{e})$ | 1137.8 | 8.6   | 1136.0 | 7.9   | -1.8  |
|                     | $\nu_{20a}^{\text{TMA}}(\text{e})$ | 1082.6 | 15.6  | 1081.7 | 15.5  | -0.9  |
|                     | $\nu_{20b}^{\text{TMA}}(\text{e})$ | 1082.6 | 15.6  | 1081.5 | 15.4  | -1.1  |
|                     | $\nu_{21a}^{\text{TMA}}(\text{e})$ | 423.4  | 0.0   | 422.6  | 0.0   | -0.8  |
|                     | $\nu_{21b}^{\text{TMA}}(\text{e})$ | 423.4  | 0.0   | 422.5  | 0.0   | -0.9  |
|                     | $\nu_{22a}^{\text{TMA}}(\text{e})$ | 289.4  | 0.5   | 285.3  | 0.5   | -4.1  |
|                     | $\nu_{22b}^{\text{TMA}}(\text{e})$ | 289.4  | 0.5   | 285.2  | 0.5   | -4.2  |
| <hr/>               |                                    |        |       |        |       |       |
| OCS                 | $\nu_1^{\text{SCO}}(\Sigma^+)$     | 901.2  | 5.8   | 888.0  | 2.5   | -13.2 |
|                     | $\nu_{2a}^{\text{SCO}}(\Pi)$       | 495.0  | 0.9   | 506.2  | 1.1   | 11.2  |
|                     | $\nu_{2b}^{\text{SCO}}(\Pi)$       | 495.0  | 0.9   | 506.0  | 1.1   | 11.0  |
|                     | $\nu_3^{\text{SCO}}(\Sigma^-)$     | 2100.7 | 669.1 | 2085.2 | 755.4 | -15.5 |
| <hr/>               |                                    |        |       |        |       |       |
| Van der Waals modes |                                    |        |       | 57.0   | 0.3   |       |
|                     |                                    |        |       | 53.1   | 0.3   |       |
|                     |                                    |        |       | 52.9   | 0.3   |       |
|                     |                                    |        |       | 11.6   | 0.0   |       |
|                     |                                    |        |       | 7.4    | 0.0   |       |
